# Supplementary material for: Generation of benzoimidazo[1,5-a]imidazoles via a copper-catalyzed tandem reaction of carbodiimide and isocyanoacetate
Source: Royal Society of Chemistry journal article supplement (doi:10.1039/c2cc32135a), 2012-01-01

# Generation of benzoimidazo[1,5-a]imidazoles via a copper-catalyzed tandem reaction of carbodiimide and isocyanoacetate

Guanyinsheng Qiu<sup>a</sup> and Jie Wu<sup>\*,a,b</sup>

<sup>a</sup> *Department of Chemistry, Fudan University, 220 Handan Road, Shanghai 200433, China*

<sup>b</sup> *State Key Laboratory of Organometallic Chemistry, Shanghai Institute of Organic Chemistry, Chinese Academy of Sciences, 354 Fenglin Road, Shanghai 200032, China*

jie\_wu@fudan.edu.cn

## Supporting Information

1. General experimental methods (S2).
2. General experimental procedure and characterization data (S2-S8).
3. <sup>1</sup>H and <sup>13</sup>C NMR spectra of compound **3-5** (S9-S38).

## General Materials and Methods:

Unless otherwise stated, all commercial reagents were used as received. All solvents were dried and distilled according to standard procedures. Flash column chromatography was performed using silica gel (60-Å pore size, 32–63 µm, standard grade). Analytical thin-layer chromatography was performed using glass plates pre-coated with 0.25 mm 230–400 mesh silica gel impregnated with a fluorescent indicator (254 nm). Thin layer chromatography plates were visualized by exposure to ultraviolet light. Organic solutions were concentrated on rotary evaporators at ~20 Torr at 25–35°C. Nuclear magnetic resonance (NMR) spectra are recorded in parts per million from internal tetramethylsilane on the  $\delta$  scale.  $^1\text{H}$  and  $^{13}\text{C}$  NMR spectra were recorded in  $\text{CDCl}_3$  on a Bruker DRX-400 spectrometer operating at 400 MHz and 100 MHz, respectively. All chemical shift values are quoted in ppm and coupling constants quoted in Hz. High resolution mass spectrometry (HRMS) spectra were obtained on a micrOTOF II Instrument.

*General procedure of the synthesis of benzoimidazo[1,5-a]imidazoles 3 via a copper-catalyzed tandem reaction of carbodiimide 1 and isocyanoacetate 2*

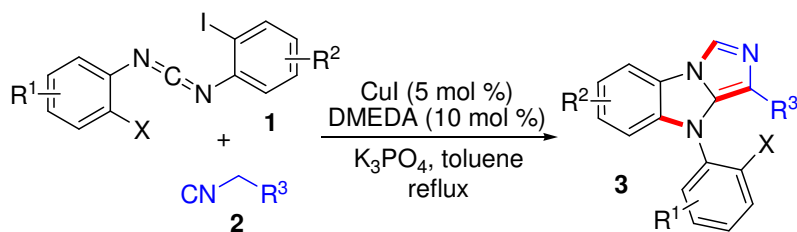

Copper(I) iodide (10 mol %), DMEDA (20 mol %), and  $\text{K}_3\text{PO}_4$  (2 equiv) were added to a solution of carbodiimide **1** (0.5 mmol) in toluene (5 mL) under  $\text{N}_2$  atmosphere at room temperature. After 2 minutes, isocyanoacetate (1.2 equiv) was added, and the mixture was stirred at reflux. After completion of reaction as indicated by TLC (8–12 hrs), the solvent was evaporated. The residue was purified on silica gel providing benzoimidazo[1,5-a]imidazole **3**.

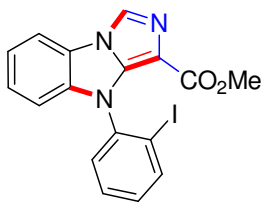

Benzoimidazo[1,5-a]imidazole **3a**.  $^1\text{H}$  NMR (400 MHz,  $\text{CDCl}_3$ )  $\delta$  3.49 (s, 3H), 6.92 (d,  $J = 7.2$  Hz, 1H), 7.27-7.34 (m, 3H), 7.48 (d,  $J = 8.0$  Hz, 1H), 7.54 (d,  $J = 7.6$  Hz, 1H), 7.77 (d,  $J = 7.6$  Hz, 1H), 8.01-8.04 (m, 2H);  $^{13}\text{C}$  NMR (100 MHz,  $\text{CDCl}_3$ )  $\delta$  50.7, 98.7, 106.1, 111.3, 111.8, 120.7, 121.8, 122.7, 125.4, 128.9, 129.8, 130.7, 138.4, 138.6, 139.3, 162.1; HRMS Calcd for  $\text{C}_{17}\text{H}_{13}\text{IN}_3\text{O}_2^+$  (ESI,  $\text{M}+\text{H}^+$ ): 418.0047; found: 418.0057.

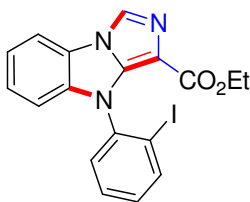

Benzoimidazo[1,5-a]imidazole **3b**.  $^1\text{H}$  NMR (400 MHz,  $\text{CDCl}_3$ )  $\delta$  1.03 (t,  $J = 6.4$  Hz, 3H), 3.97-4.01 (m, 2H), 6.90 (d,  $J = 7.6$  Hz, 1H), 7.23-7.41 (m, 3H), 7.47-7.55 (m, 2H), 7.75 (d,  $J = 7.6$  Hz, 1H), 7.99-8.04 (m, 2H);  $^{13}\text{C}$  NMR (100 MHz,  $\text{CDCl}_3$ )  $\delta$  14.2, 59.5, 99.0, 111.6, 111.8, 120.3, 120.8, 121.9, 122.3, 125.6, 129.2, 129.8, 130.3, 130.8, 138.6, 139.6, 140.4, 162.1; HRMS Calcd for  $\text{C}_{18}\text{H}_{15}\text{IN}_3\text{O}_2^+$  (ESI,  $\text{M}+\text{H}^+$ ): 432.0203; found: 432.0202.

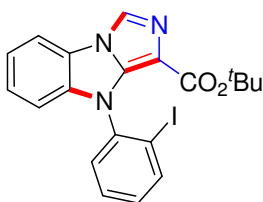

Benzoimidazo[1,5-a]imidazole **3c**.  $^1\text{H}$  NMR (400 MHz,  $\text{CDCl}_3$ )  $\delta$  1.26 (s, 3H), 6.85 (d,  $J = 7.6$  Hz, 1H), 7.22-7.30 (m, 3H), 7.46-7.53 (m, 2H), 7.75 (d,  $J = 7.6$  Hz, 1H), 7.97-8.04 (m, 2H);  $^{13}\text{C}$  NMR (100 MHz,  $\text{CDCl}_3$ )  $\delta$  28.1, 50.8, 98.6, 109.3, 111.7, 111.8, 120.3, 121.9, 122.3, 125.4, 129.3, 129.7, 129.8, 130.7, 139.2, 140.0, 140.4, 162.3; HRMS Calcd for  $\text{C}_{20}\text{H}_{19}\text{IN}_3\text{O}_2^+$  (ESI,  $\text{M}+\text{H}^+$ ): 460.0516; found: 460.0505.

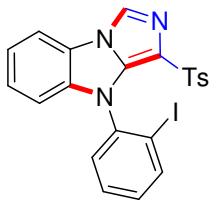

Benzoimidazo[1,5-a]imidazole **3d**.  $^1\text{H}$  NMR (400 MHz,  $\text{CDCl}_3$ )  $\delta$  2.67 (s, 3H), 6.61 (d,  $J = 7.6$  Hz, 1H), 6.89-6.92 (m, 1H), 7.07-7.30 (m, 9H), 7.47 (d,  $J = 7.6$  Hz, 1H), 7.89-7.94 (m, 1H);  $^{13}\text{C}$  NMR (100 MHz,  $\text{CDCl}_3$ )  $\delta$  21.2, 98.6, 109.4, 116.8, 120.4, 122.3, 129.8, 130.4, 130.8, 135.8, 140.4, 141.8, 156.3; HRMS Calcd for  $\text{C}_{22}\text{H}_{17}\text{IN}_3\text{O}_2\text{S}^+$  (ESI,  $\text{M}+\text{H}^+$ ): 514.0081; found: 514.0084.

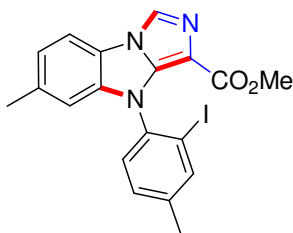

Benzoimidazo[1,5-a]imidazole **3e**.  $^1\text{H}$  NMR (400 MHz,  $\text{CDCl}_3$ )  $\delta$  2.41 (s, 3H), 2.45 (s, 3H), 3.49 (s, 3H), 6.69 (s, 1H), 7.10 (d,  $J = 8.0$  Hz, 1H), 7.33-7.35 (m, 2H), 7.60 (d,  $J = 7.6$  Hz, 1H), 7.87 (s, 1H), 7.93 (s, 1H);  $^{13}\text{C}$  NMR (100 MHz,  $\text{CDCl}_3$ )  $\delta$  20.8, 21.7, 50.9, 98.7, 106.3, 111.4, 111.6, 120.6, 120.9, 122.7, 129.4, 129.8, 136.0, 139.2, 139.8, 162.4; HRMS Calcd for  $\text{C}_{19}\text{H}_{17}\text{IN}_3\text{O}_2^+$  (ESI,  $\text{M}+\text{H}^+$ ): 446.0360; found: 446.0347.

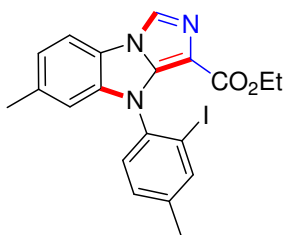

Benzoimidazo[1,5-a]imidazole **3f**.  $^1\text{H}$  NMR (400 MHz,  $\text{CDCl}_3$ )  $\delta$  1.05 (t,  $J = 6.4$  Hz, 3H), 2.41 (s, 3H), 2.45 (s, 3H), 4.02-4.05 (m, 2H), 6.67 (s, 1H), 7.09 (d,  $J = 7.6$  Hz, 1H), 7.27-7.33 (m, 2H), 7.60 (d,  $J = 8.0$  Hz, 1H), 7.86 (s, 1H), 7.95 (s, 1H);  $^{13}\text{C}$  NMR (100 MHz,  $\text{CDCl}_3$ )  $\delta$  14.4, 20.7, 21.7, 59.5, 98.7, 111.4, 111.6, 122.6, 123.2, 129.4, 129.8, 130.5, 135.9, 136.2, 139.2, 139.9, 140.6, 141.2, 162.0; HRMS Calcd for  $\text{C}_{20}\text{H}_{19}\text{IN}_3\text{O}_2^+$  (ESI,  $\text{M}+\text{H}^+$ ): 460.0516; found: 460.0508.

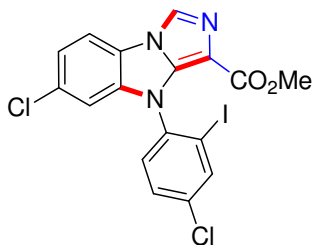

Benzoimidazo[1,5-a]imidazole **3g**.  $^1\text{H}$  NMR (400 MHz,  $\text{CDCl}_3$ )  $\delta$  3.59 (s, 3H), 6.90 (s, 1H), 7.28-7.31 (m, 1H), 7.42 (d,  $J = 8.0$  Hz, 1H), 7.55 (d,  $J = 8.0$  Hz, 1H), 7.69 (d,  $J = 8.8$  Hz, 1H), 7.98 (s, 1H), 8.04 (s, 1H);  $^{13}\text{C}$  NMR (100 MHz,  $\text{CDCl}_3$ )  $\delta$  51.1, 99.0, 106.9, 111.6, 112.8, 121.7, 122.5, 129.5, 130.4, 131.6, 136.2, 139.1, 139.4, 162.1; HRMS Calcd for  $\text{C}_{17}\text{H}_{11}\text{Cl}_2\text{IN}_3\text{O}_2^+$  (ESI,  $\text{M}+\text{H}^+$ ): 485.9268; found: 485.9250.

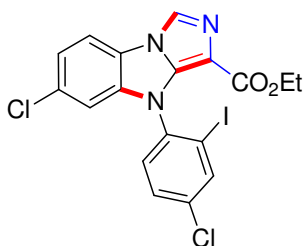

Benzoimidazo[1,5-a]imidazole **3h**.  $^1\text{H}$  NMR (400 MHz,  $\text{CDCl}_3$ )  $\delta$  1.12 (t,  $J = 6.4$  Hz, 3H), 4.07-4.10 (m, 2H), 6.87 (s, 1H), 7.27-7.31 (m, 1H), 7.41 (d,  $J = 8.0$  Hz, 1H), 7.54 (d,  $J = 8.4$  Hz, 1H), 7.68 (d,  $J = 8.4$  Hz, 1H), 7.98 (s, 1H), 8.04 (s, 1H);  $^{13}\text{C}$  NMR (100 MHz,  $\text{CDCl}_3$ )  $\delta$  14.2, 59.8, 99.2, 107.3, 111.6, 112.8, 120.9, 121.7, 122.4, 129.6, 130.4, 131.6, 136.2, 136.7, 139.2, 161.7; HRMS Calcd for  $\text{C}_{18}\text{H}_{13}\text{Cl}_2\text{IN}_3\text{O}_2^+$  (ESI,  $\text{M}+\text{H}^+$ ): 499.9424; found: 499.9414.

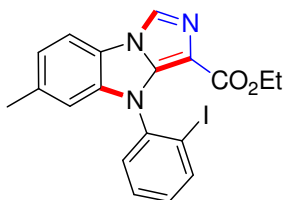

Benzoimidazo[1,5-a]imidazole **3i**.  $^1\text{H}$  NMR (400 MHz,  $\text{CDCl}_3$ )  $\delta$  1.12 (t,  $J = 6.4$  Hz, 3H), 2.41 (s, 3H), 3.98-4.10 (m, 2H), 6.86 (s, 1H), 6.90-7.98 (m, 8H);  $^{13}\text{C}$  NMR (100 MHz,  $\text{CDCl}_3$ )  $\delta$  14.3, 21.7, 59.7, 99.9, 109.7, 111.6, 111.7, 122.0, 122.9, 125.7, 129.6, 130.9, 132.4, 134.7, 136.3, 139.8, 140.2, 140.8, 161.7; HRMS Calcd for  $\text{C}_{19}\text{H}_{17}\text{Cl}_2\text{IN}_3\text{O}_2^+$  (ESI,  $\text{M}+\text{H}^+$ ): 446.0360; found: 446.0349.

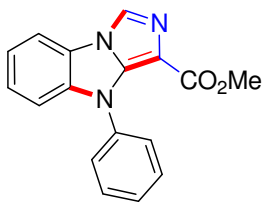

Benzoimidazo[1,5-a]imidazole **3j**.  $^1\text{H}$  NMR (400 MHz,  $\text{CDCl}_3$ )  $\delta$  3.61 (s, 3H), 7.11 (d,  $J = 8.0$  Hz, 1H), 7.20-7.29 (m, 2H), 7.40 (d,  $J = 7.6$  Hz, 2H), 7.46-7.61 (m, 3H), 7.68 (d,  $J = 7.6$  Hz, 1H), 7.93 (s, 1H);  $^{13}\text{C}$  NMR (100 MHz,  $\text{CDCl}_3$ )  $\delta$  50.7, 105.5, 111.1, 111.7, 120.5, 121.7, 122.8, 125.4, 127.3, 128.5, 128.8, 135.6, 139.3, 141.4, 162.1; HRMS Calcd for  $\text{C}_{17}\text{H}_{13}\text{N}_3\text{NaO}_2^+$  (ESI,  $\text{M}+\text{Na}^+$ ): 314.0900; found: 314.0883.

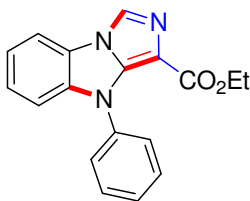

Benzoimidazo[1,5-a]imidazole **3k**.  $^1\text{H}$  NMR (400 MHz,  $\text{CDCl}_3$ )  $\delta$  1.20 (t,  $J = 6.4$  Hz, 3H), 4.03-4.08 (m, 3H), 7.11 (d,  $J = 8.0$  Hz, 1H), 7.20-7.28 (m, 2H), 7.29-7.52 (m, 5H), 7.68 (d,  $J = 7.6$  Hz, 1H), 7.93 (s, 1H);  $^{13}\text{C}$  NMR (100 MHz,  $\text{CDCl}_3$ )  $\delta$  14.6, 59.9, 106.1, 111.7, 112.7, 120.7, 121.9, 123.3, 125.8, 127.5, 130.0, 133.6, 138.9, 140.1, 162.4; HRMS Calcd for  $\text{C}_{18}\text{H}_{16}\text{N}_3\text{O}_2^+$  (ESI,  $\text{M}+\text{H}^+$ ): 306.1237; found: 306.1258.

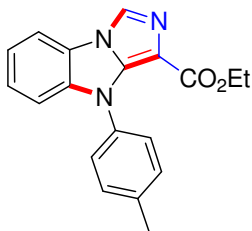

Benzoimidazo[1,5-a]imidazole **3l**.  $^1\text{H}$  NMR (400 MHz,  $\text{CDCl}_3$ )  $\delta$  1.09 (t,  $J = 6.4$  Hz, 3H), 2.47 (s, 3H), 4.08-4.11 (m, 3H), 7.16 (d,  $J = 8.0$  Hz, 1H), 7.34-7.35 (m, 6H), 7.72 (d,  $J = 7.2$  Hz, 1H), 7.98 (s, 1H);  $^{13}\text{C}$  NMR (100 MHz,  $\text{CDCl}_3$ )  $\delta$  14.2, 21.3, 59.6, 105.8, 111.4, 111.7, 120.5, 121.7, 122.9, 125.5, 127.2, 129.7, 133.3, 138.6, 139.8, 162.1; HRMS Calcd for  $\text{C}_{19}\text{H}_{18}\text{N}_3\text{O}_2^+$  (ESI,  $\text{M}+\text{H}^+$ ): 320.1394; found: 320.1392.

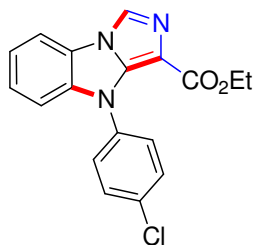

Benzoimidazo[1,5-a]imidazole **3m**.  $^1\text{H}$  NMR (400 MHz,  $\text{CDCl}_3$ )  $\delta$  1.02 (t,  $J$  = 6.4 Hz, 3H), 4.01-4.06 (m, 3H), 7.09 (d,  $J$  = 8.0 Hz, 1H), 7.19-7.21 (m, 1H), 7.23-7.28 (m, 5H), 7.65 (d,  $J$  = 7.6 Hz, 1H), 7.91 (s, 1H);  $^{13}\text{C}$  NMR (100 MHz,  $\text{CDCl}_3$ )  $\delta$  14.6, 60.2, 106.5, 111.9, 112.3, 120.7, 122.2, 123.5, 126.0, 127.7, 130.2, 139.1, 140.3, 162.6; HRMS Calcd for  $\text{C}_{18}\text{H}_{15}\text{ClN}_3\text{O}_2^+$  (ESI,  $\text{M}+\text{H}^+$ ): 340.0847; found: 340.0842.

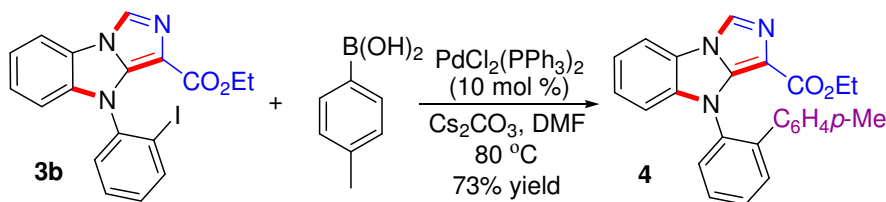

4-Methylphenylboronic acid (1.2 equiv),  $\text{PdCl}_2(\text{PPh}_3)_2$  (10 mol %), and  $\text{Cs}_2\text{CO}_3$  (2 equiv) were added to a solution of benzoimidazo[1,5-a]imidazole **3b** (0.2 mmol) in DMF under  $\text{N}_2$  atmosphere at 80 °C. After completion of reaction as indicated by TLC, the solvent was evaporated. The residue was purified on silica gel providing benzoimidazo[1,5-a]imidazole **4**.

$^1\text{H}$  NMR (400 MHz,  $\text{CDCl}_3$ )  $\delta$  0.91 (t,  $J$  = 6.4 Hz, 3H), 2.16 (s, 3H), 3.99-4.04 (m, 2H), 6.87-6.91 (m, 2H), 7.01 (d,  $J$  = 7.2 Hz, 1H), 7.17-7.21 (m, 3H), 7.44-7.48 (m, 3H), 7.60 (d,  $J$  = 7.2 Hz, 2H), 7.82 (d,  $J$  = 7.2 Hz, 1H), 7.92 (s, 1H);  $^{13}\text{C}$  NMR (100 MHz,  $\text{CDCl}_3$ )  $\delta$  13.9, 20.9, 59.7, 105.7, 111.5, 111.7, 121.6, 127.7, 127.9, 128.3, 128.5, 128.6, 128.9, 130.9, 131.9, 132.0, 134.3, 141.3, 161.3; HRMS Calcd for  $\text{C}_{25}\text{H}_{22}\text{N}_3\text{O}_2^+$  (ESI,  $\text{M}+\text{H}^+$ ): 396.1707; found: 396.1715.

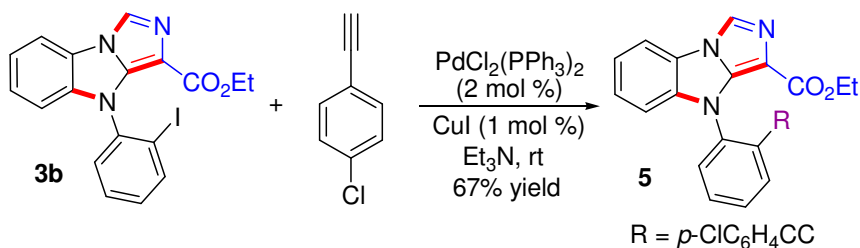

1-Chloro-4-ethynylbenzene (1.2 equiv),  $\text{PdCl}_2(\text{PPh}_3)_2$  (2 mol %),  $\text{CuI}$  (1 mol %), and benzoimidazo[1,5-*a*]imidazole **3b** (0.2 mmol) were added into a test tube. Dried triethylamine (2.0 mL) was added under  $\text{N}_2$  atmosphere. The mixture was stirred at room temperature. After completion of reaction as indicated by TLC, the solvent was evaporated. The residue was purified on silica gel providing benzoimidazo[1,5-*a*]imidazole **5**.

$^1\text{H}$  NMR (400 MHz,  $\text{CDCl}_3$ )  $\delta$  1.03 (t,  $J$  = 6.4 Hz, 3H), 4.02-4.06 (m, 2H), 6.79 (d,  $J$  = 7.2 Hz, 1H), 7.10-7.13 (m, 2H), 7.29-7.31 (m, 2H), 7.30 (d,  $J$  = 8.0 Hz, 1H), 7.54-7.57 (m, 3H), 7.70-7.72 (m, 3H), 8.01 (s, 1H);  $^{13}\text{C}$  NMR (100 MHz,  $\text{CDCl}_3$ )  $\delta$  14.2, 59.6, 85.6, 94.1, 111.8, 120.6, 121.9, 122.9, 125.5, 128.4, 128.5, 128.7, 129.0, 131.9, 132.1, 132.4, 132.6, 134.3, 138.9, 139.6, 141.3, 162.1; HRMS Calcd for  $\text{C}_{26}\text{H}_{19}\text{ClN}_3\text{O}_2^+$  (ESI,  $\text{M}+\text{H}^+$ ): 440.1160; found: 440.1166.



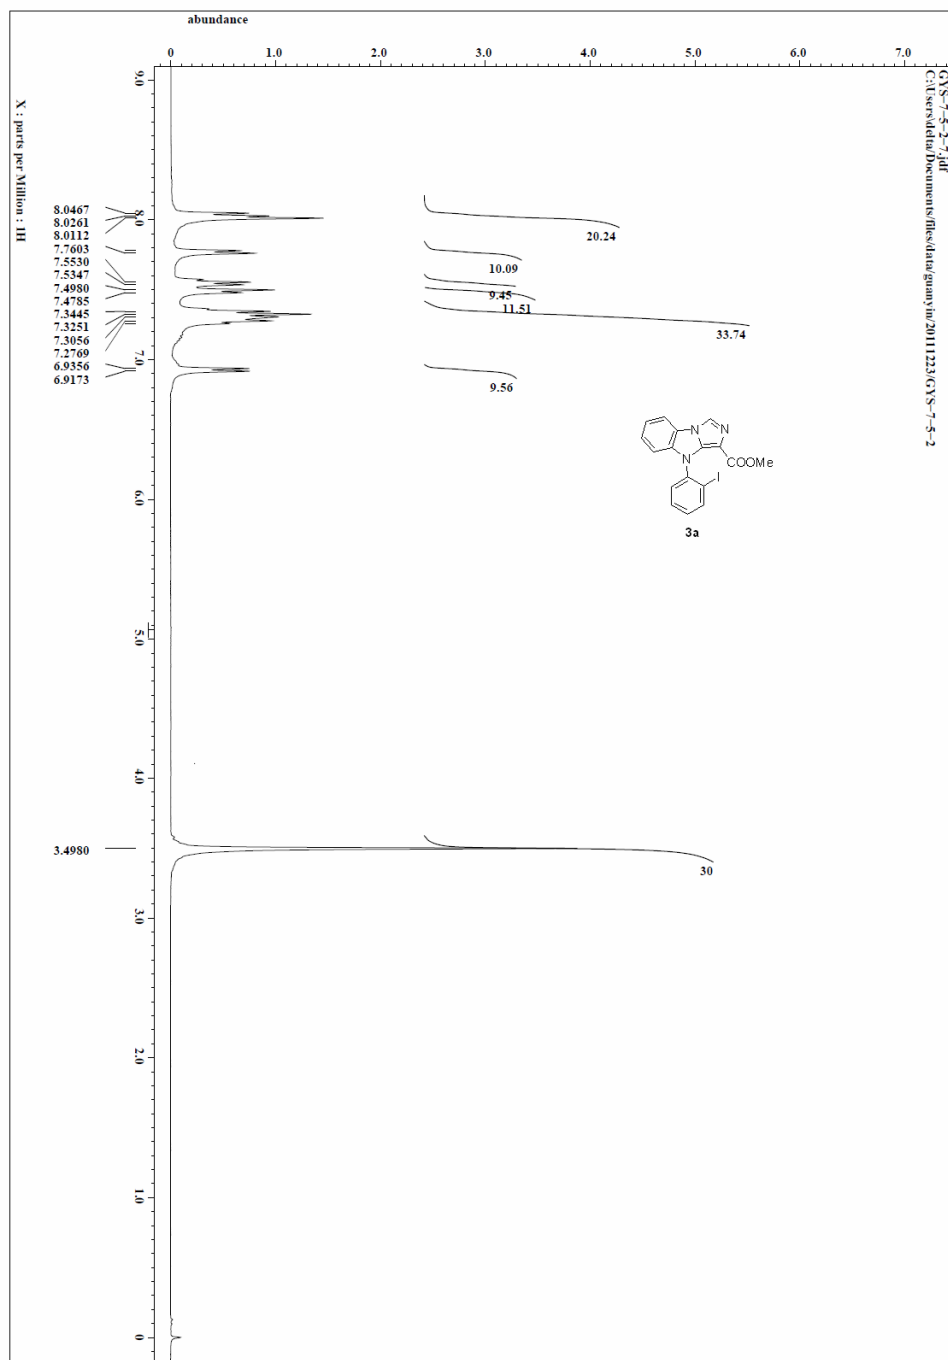

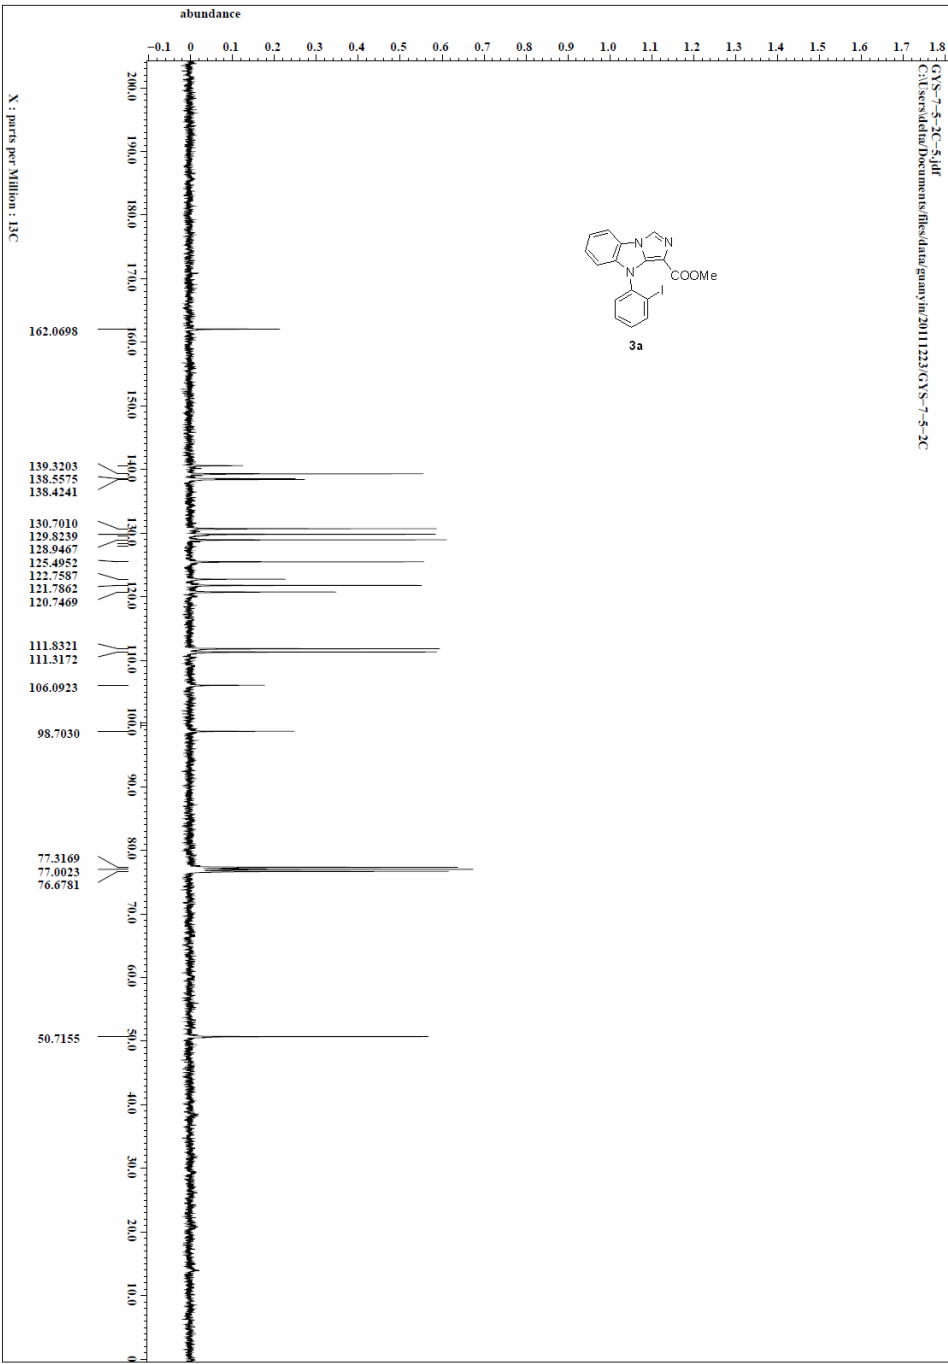

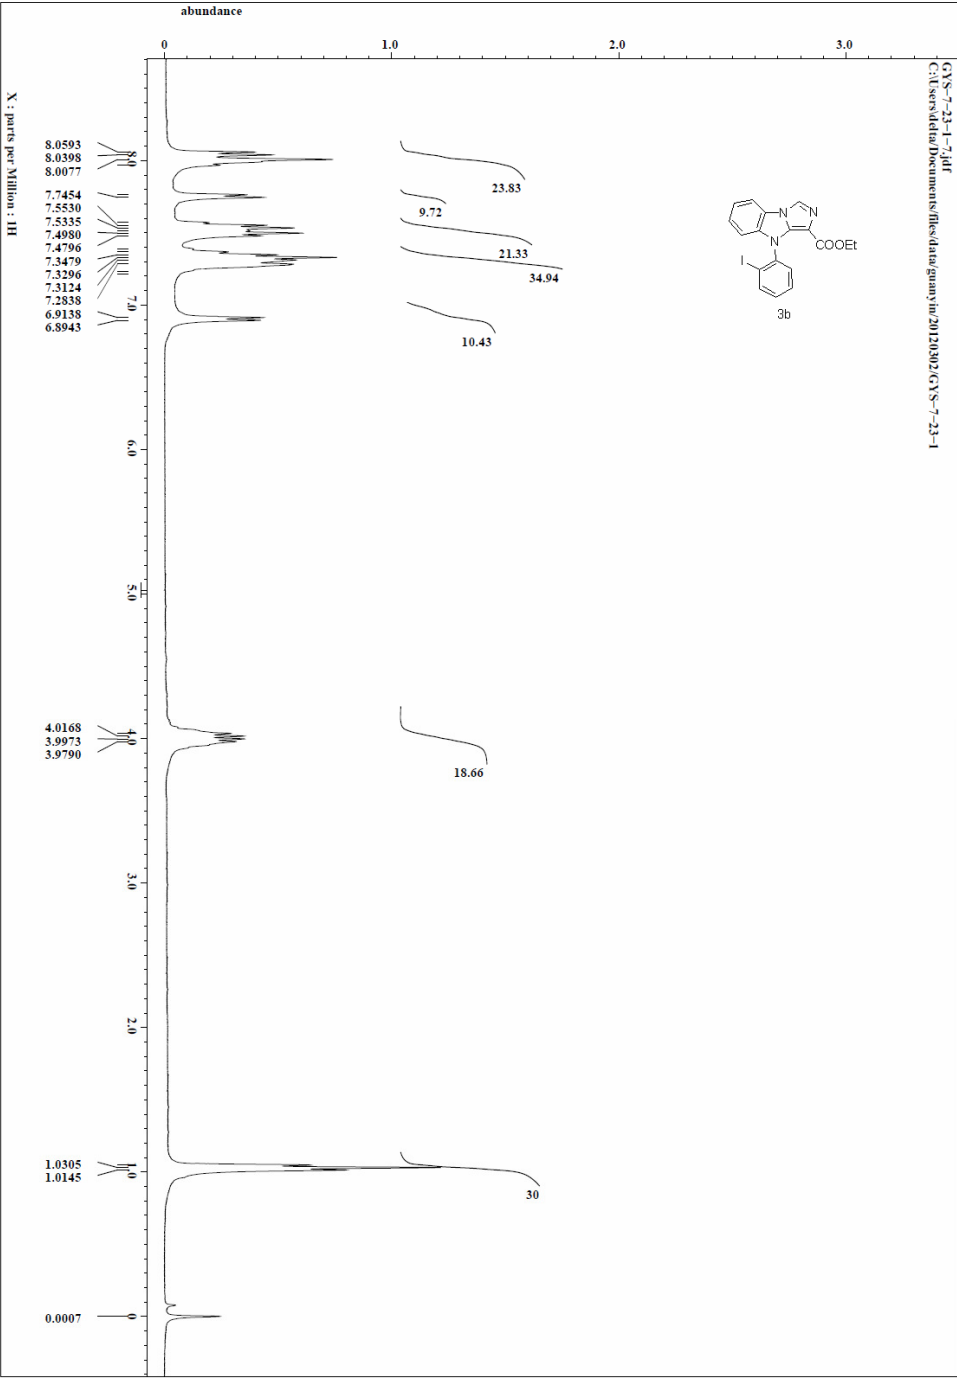

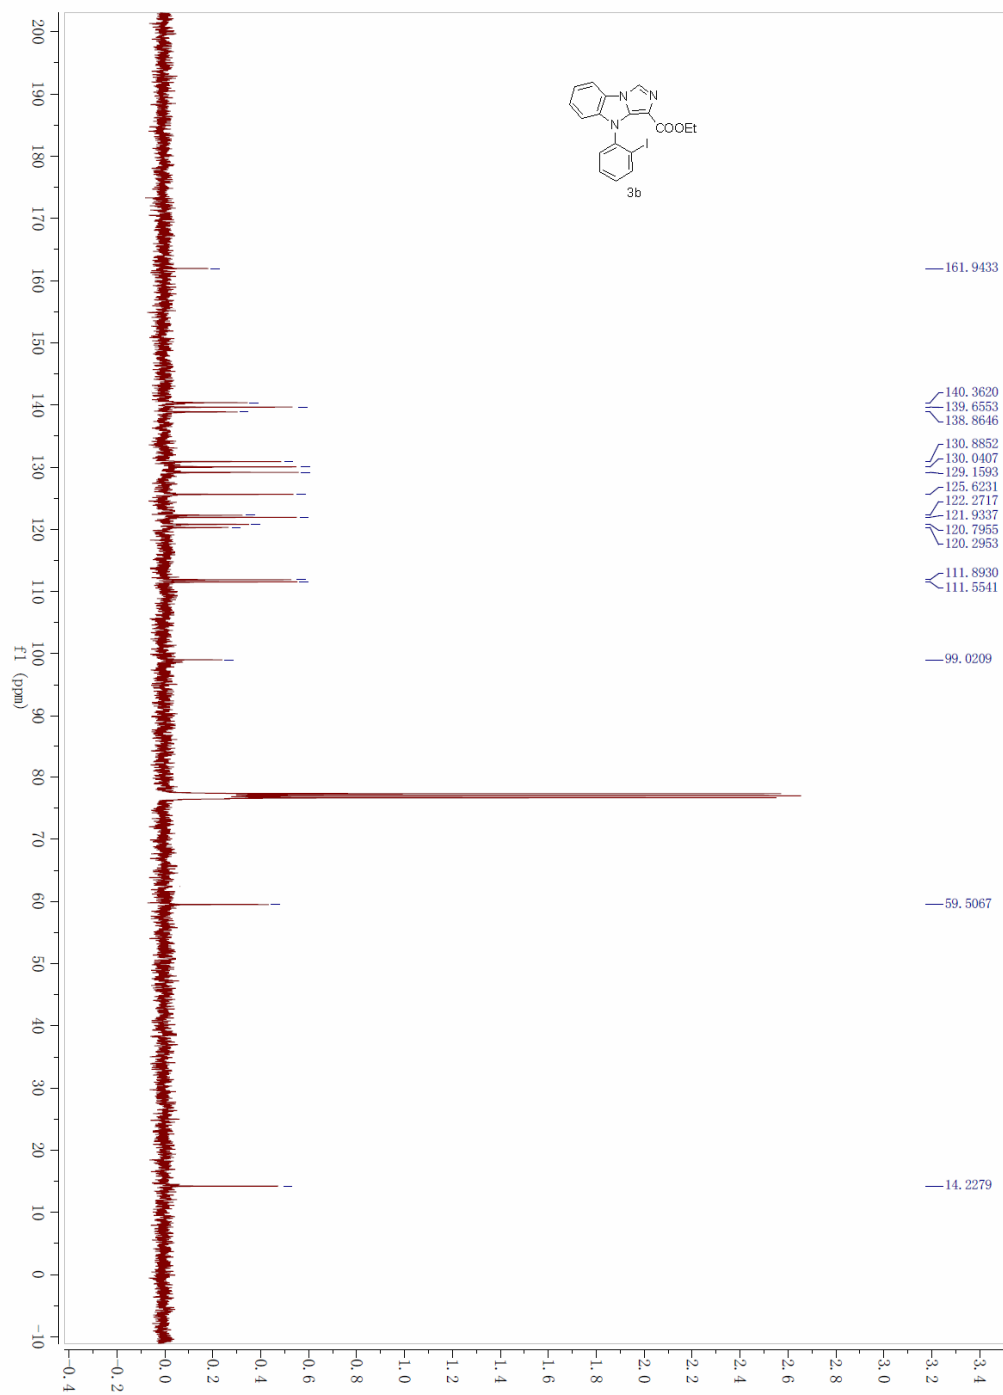

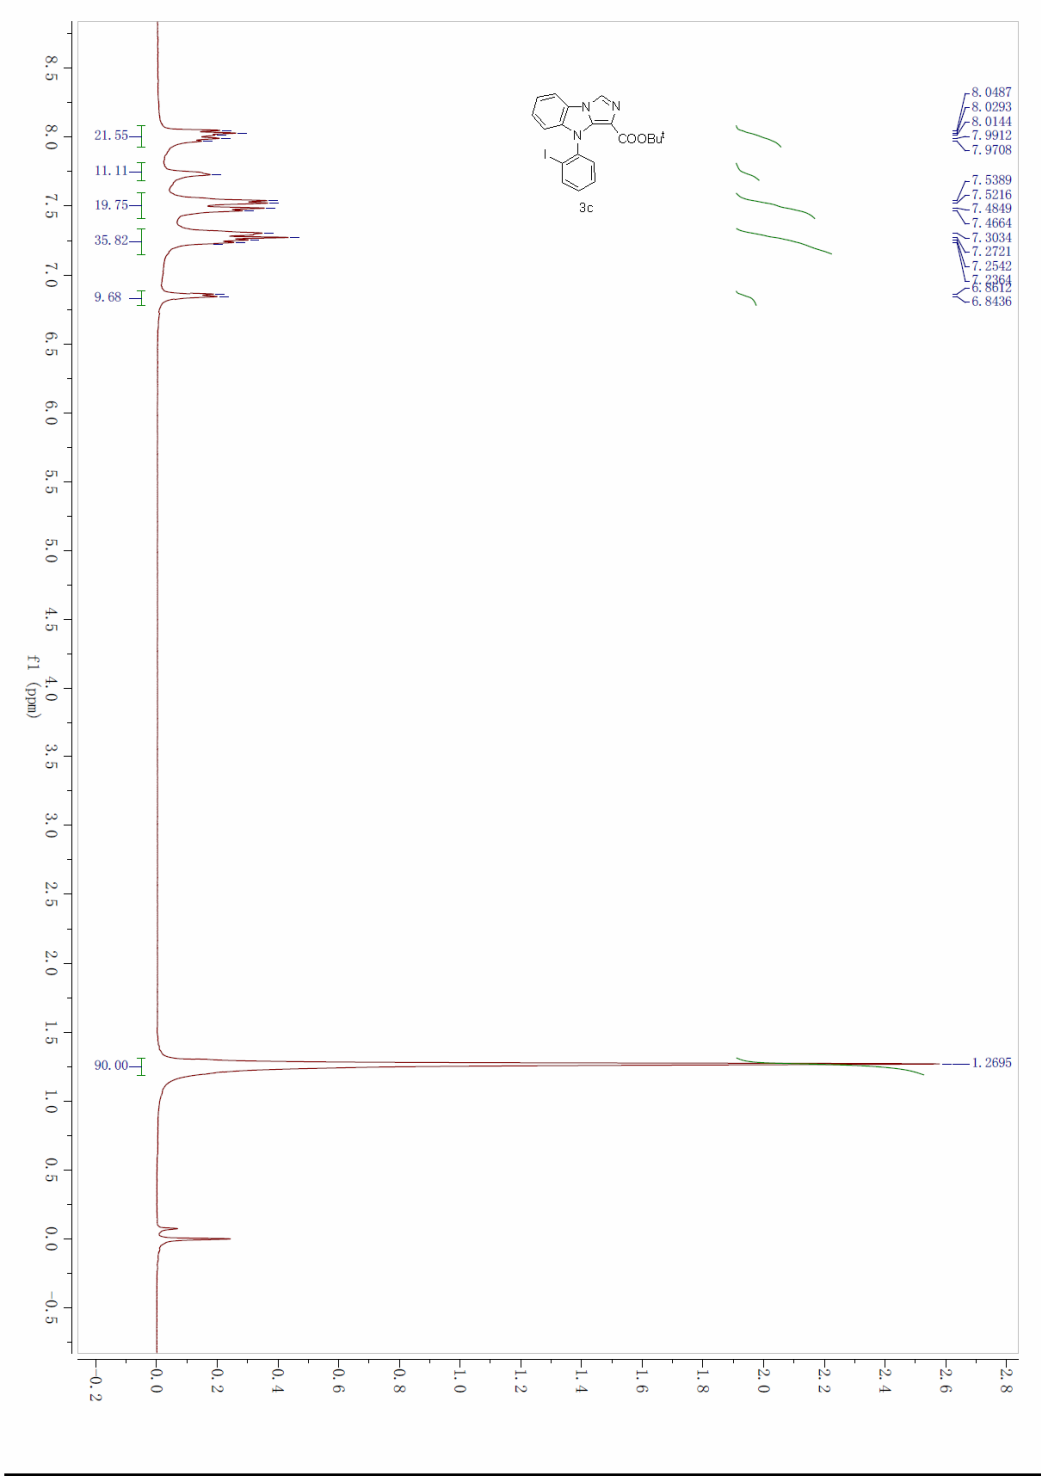

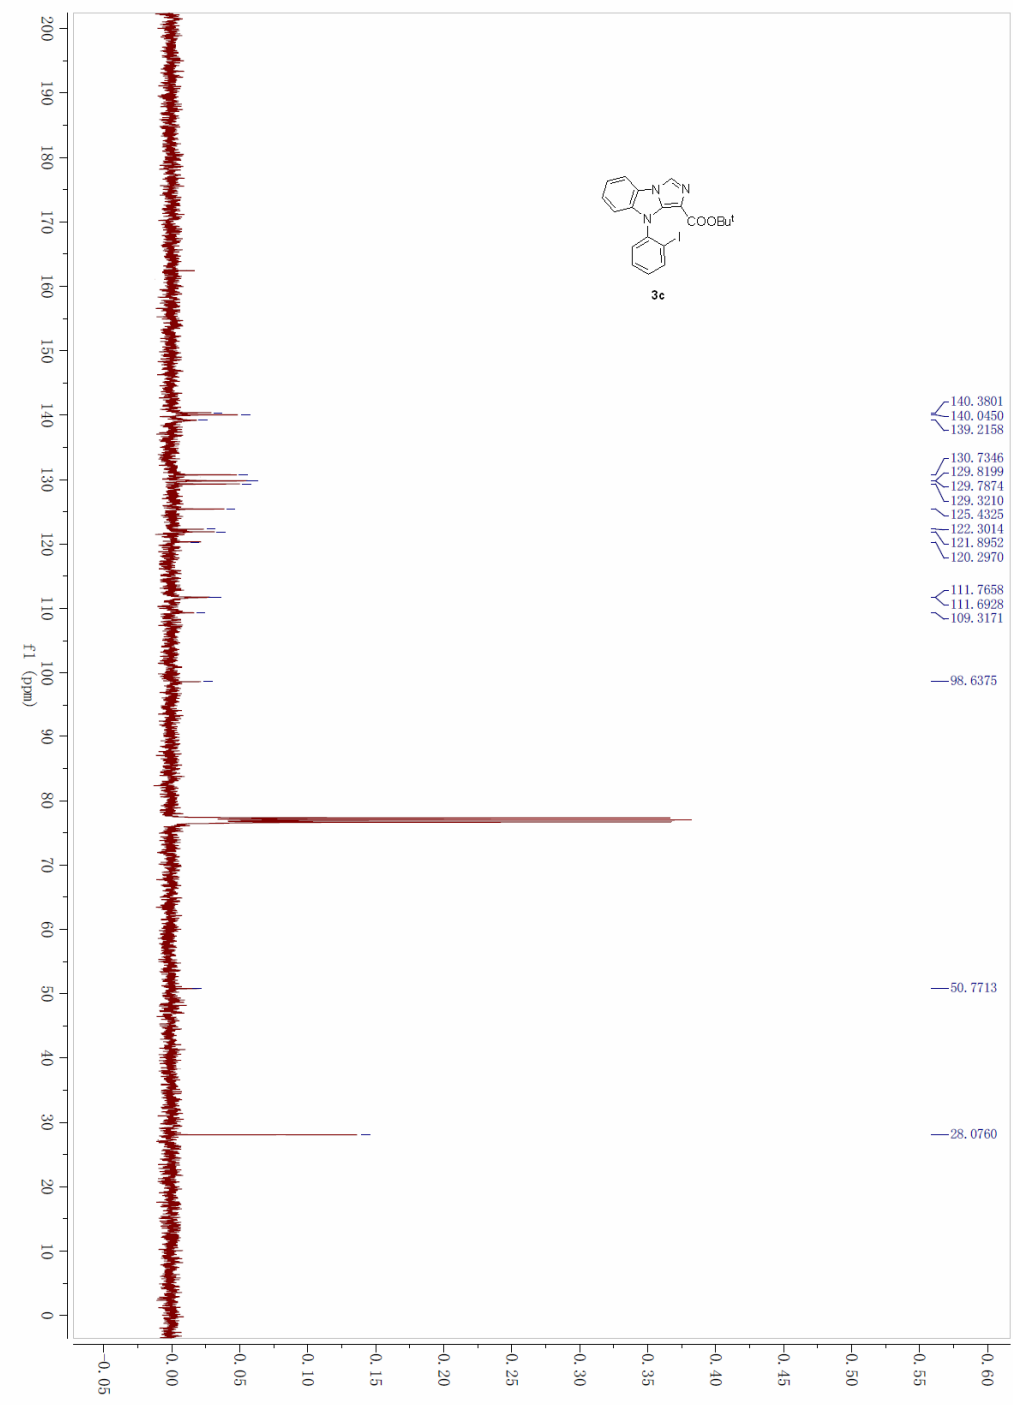

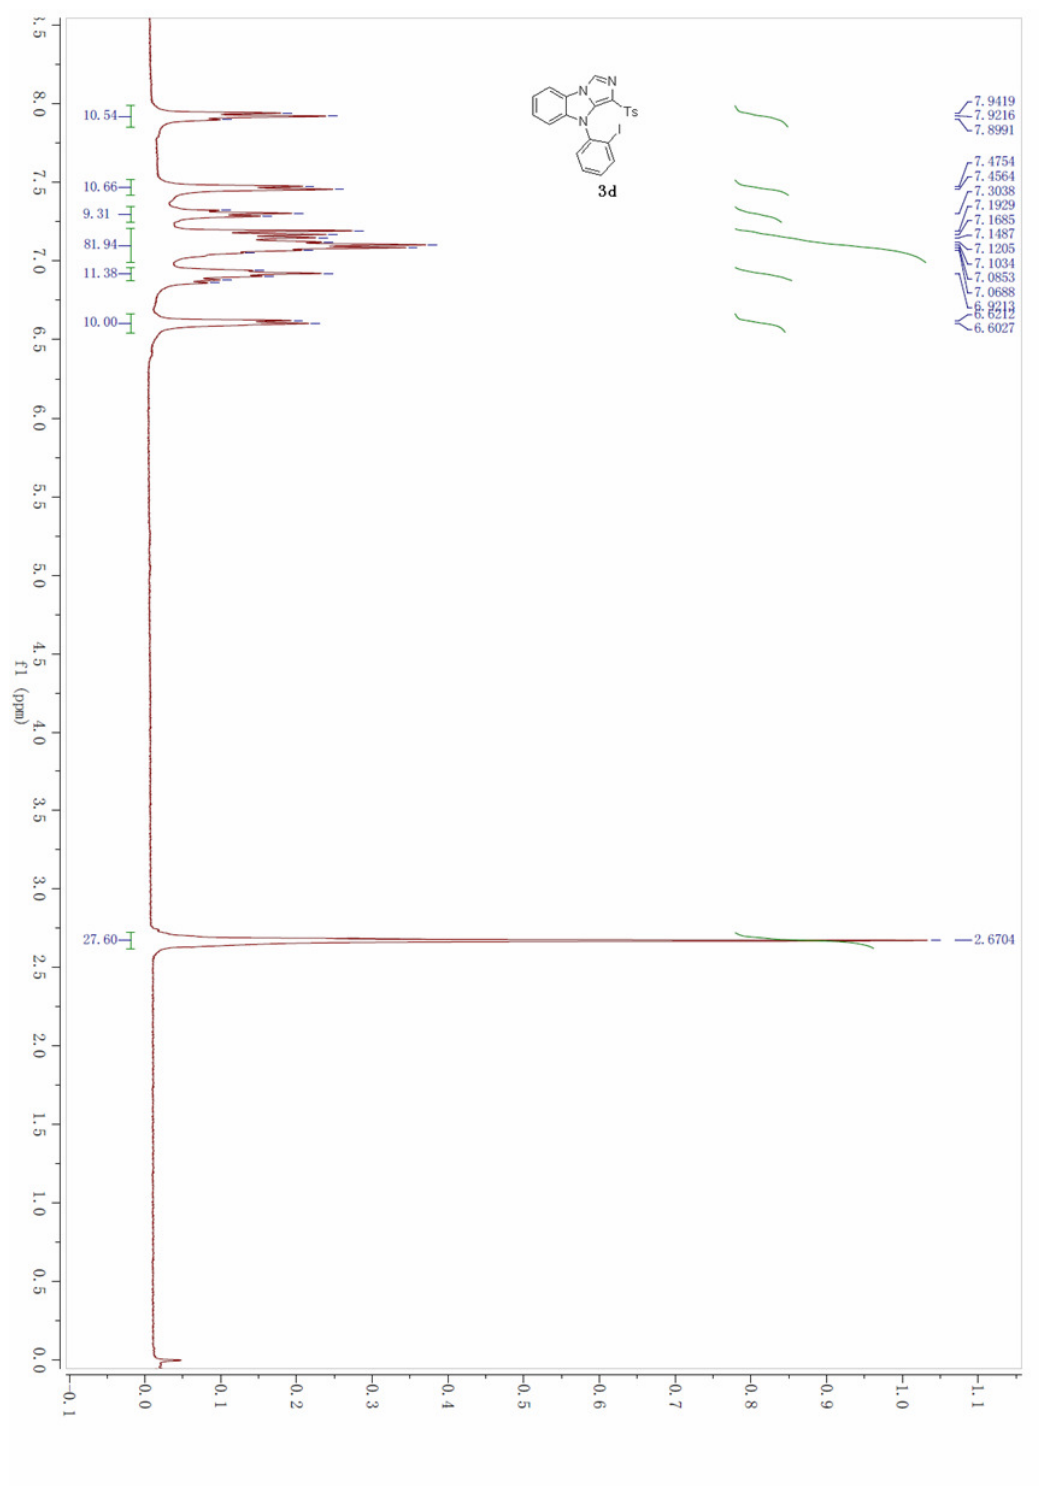

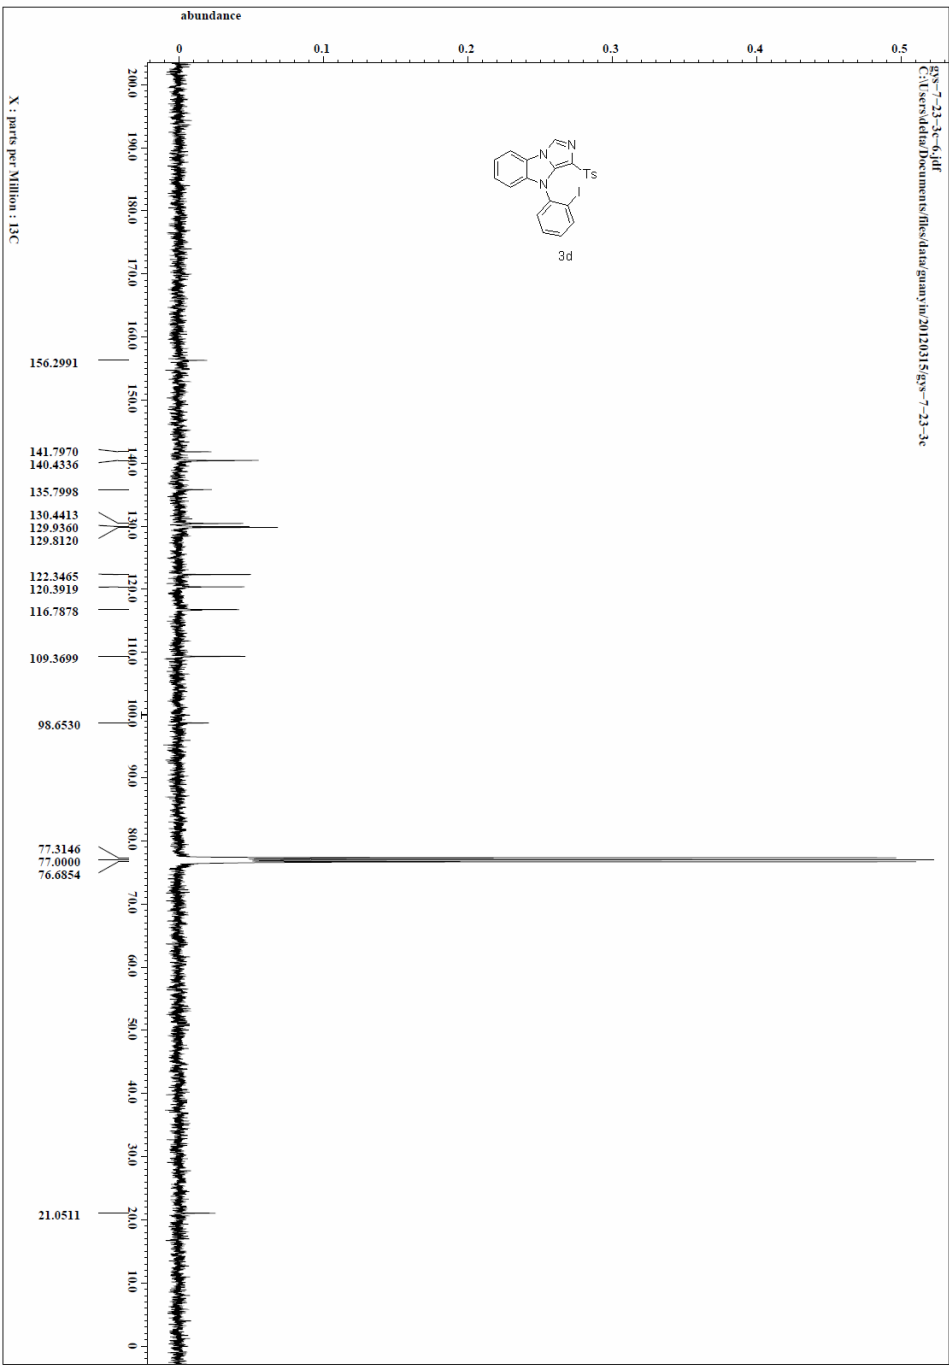



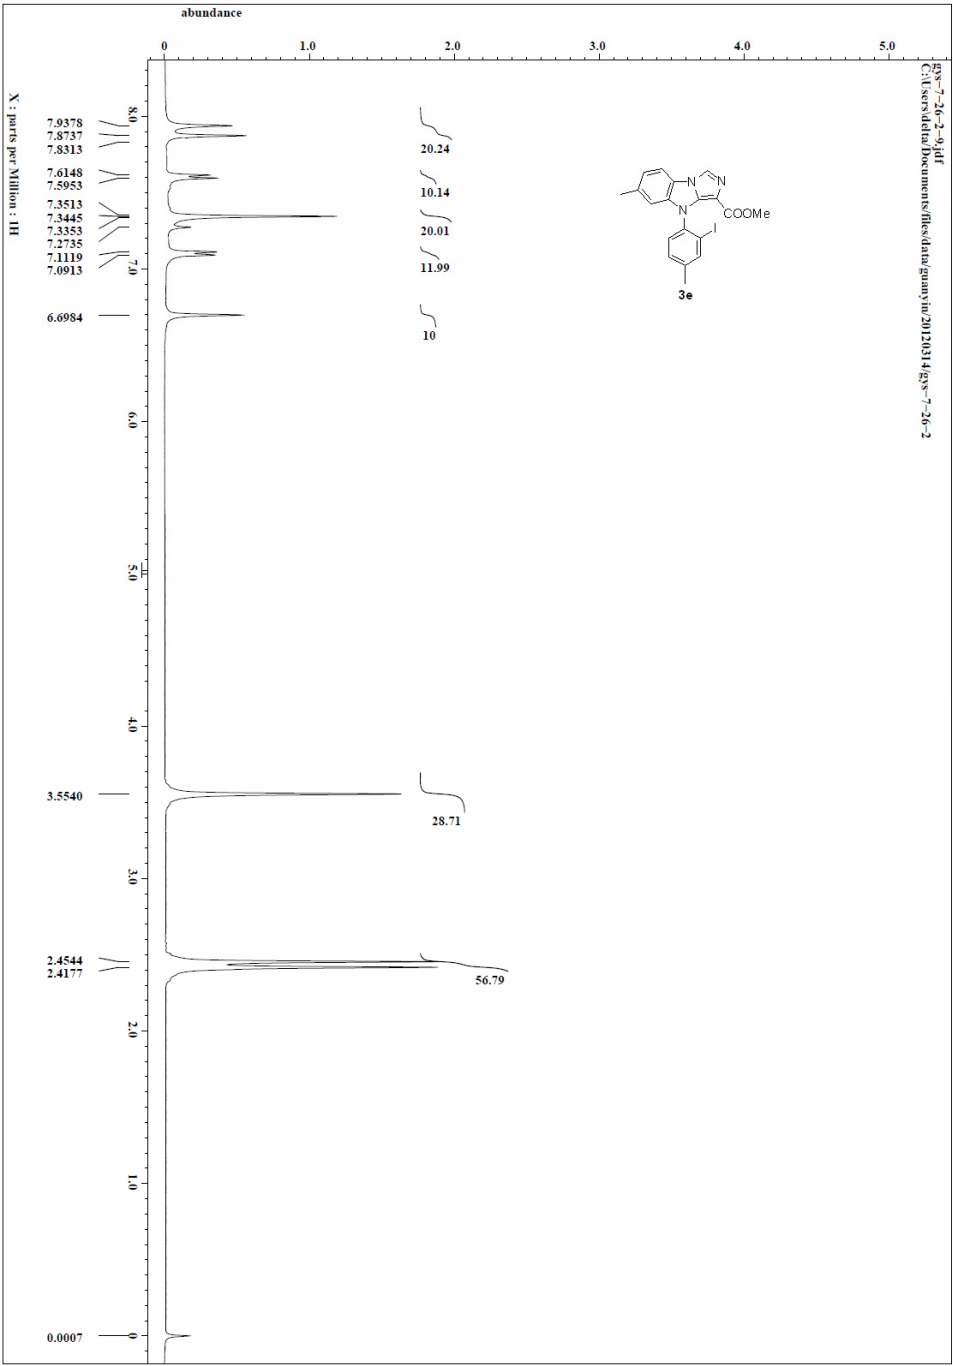

|                  |                          |
|------------------|--------------------------|
| Filename         | gsv-1_-26-26-7_3df       |
| Experiment       | single_pulse_dec         |
| Sample_id        | C:\Users\dalea\Documents |
| Software         | CHOROS-MR-0.37.5.1       |
| Temp             | 14-MR-2012.20:58:33      |
| Current time     | 14-MR-2012.20:58:33      |
| Run time         | 14-MR-2012.20:58:58      |
| Comment          |                          |
| Data format      | C:\Users\dalea\Documents |
| Din file         | 36214                    |
| Din file         | 36214                    |
| Dimensions       | X=PMU<br>Y=PMU           |
| Site             | RC3400                   |
| Spectrometer     | DECTRIS_NMR              |
| Field strength   | 9.388766 [T] (400 [MHz]) |
| X_acq duration   | 1.040333312 [s]          |
| X_freq           | 100.52530303 [MHz]       |
| X_resolution     | 100 [ppm]                |
| X_offset         | 32768                    |
| X_points         | 0.95946665 [Hz]          |
| X_resolution     | 1.31.40703518 [Hz]       |
| X_resolution     | 18.7.78218988 [MHz]      |
| X_resolution     | 5 [ppm]                  |
| Clipped          | PMU                      |
| ROI domain       |                          |
| Xir offset       |                          |
| ROI              |                          |
| ROI return       | 134                      |
| ROI              | 134                      |
| Total scans      | 184                      |
| X_90_offset      | 9.15 [deg]               |
| X_acq time       | 1.040333312 [s]          |
| X_angle          | 301 [deg]                |
| X_180            | 7 [deg]                  |
| Xir sin dec      | 5.5.20784 [deg]          |
| Xir sin noe      | 5.5.20784 [deg]          |
| Xir noise        | NMR                      |
| Xir noise        | 11 [deg]                 |
| Initial_wait     | 1 [s]                    |
| Noe              | PMU                      |
| Noe time         | 1 [s]                    |
| Relaxation delay | 2 [s]                    |
| Relaxation delay | 2.040333312 [s]          |
| Temp_get         | 3.303333312 [s]          |

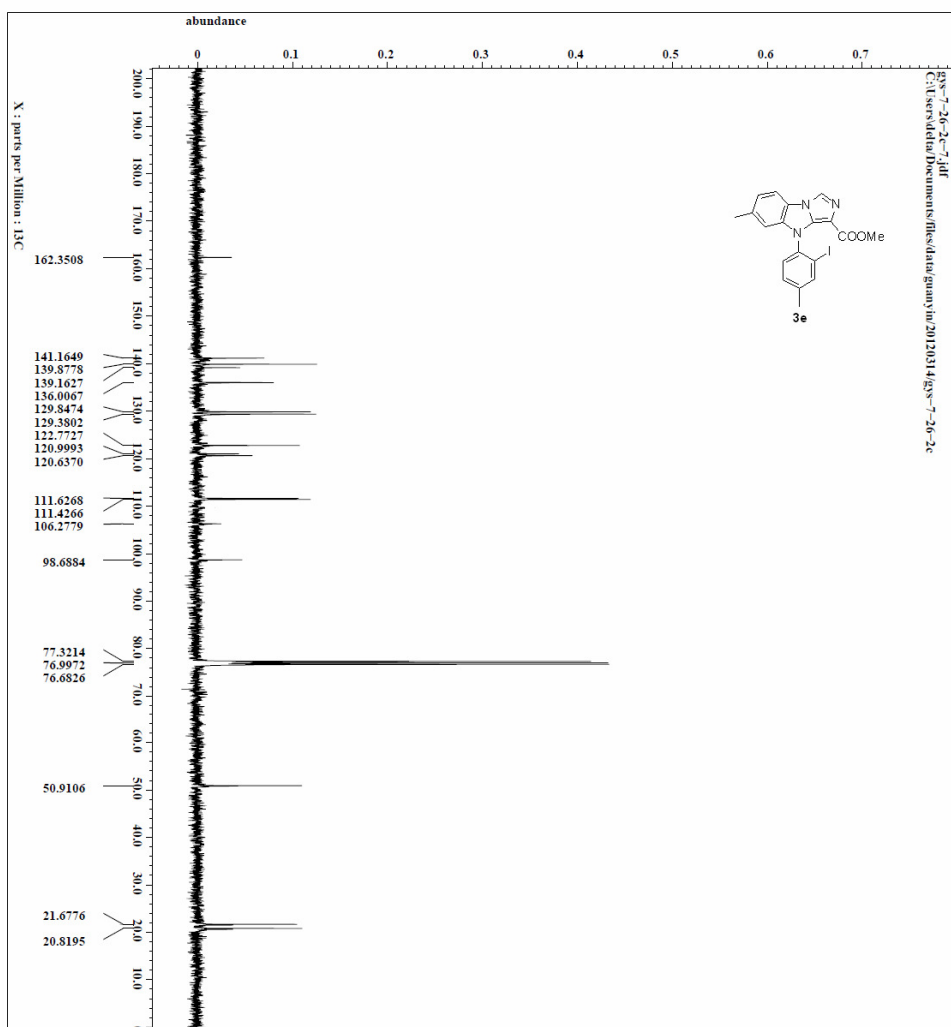

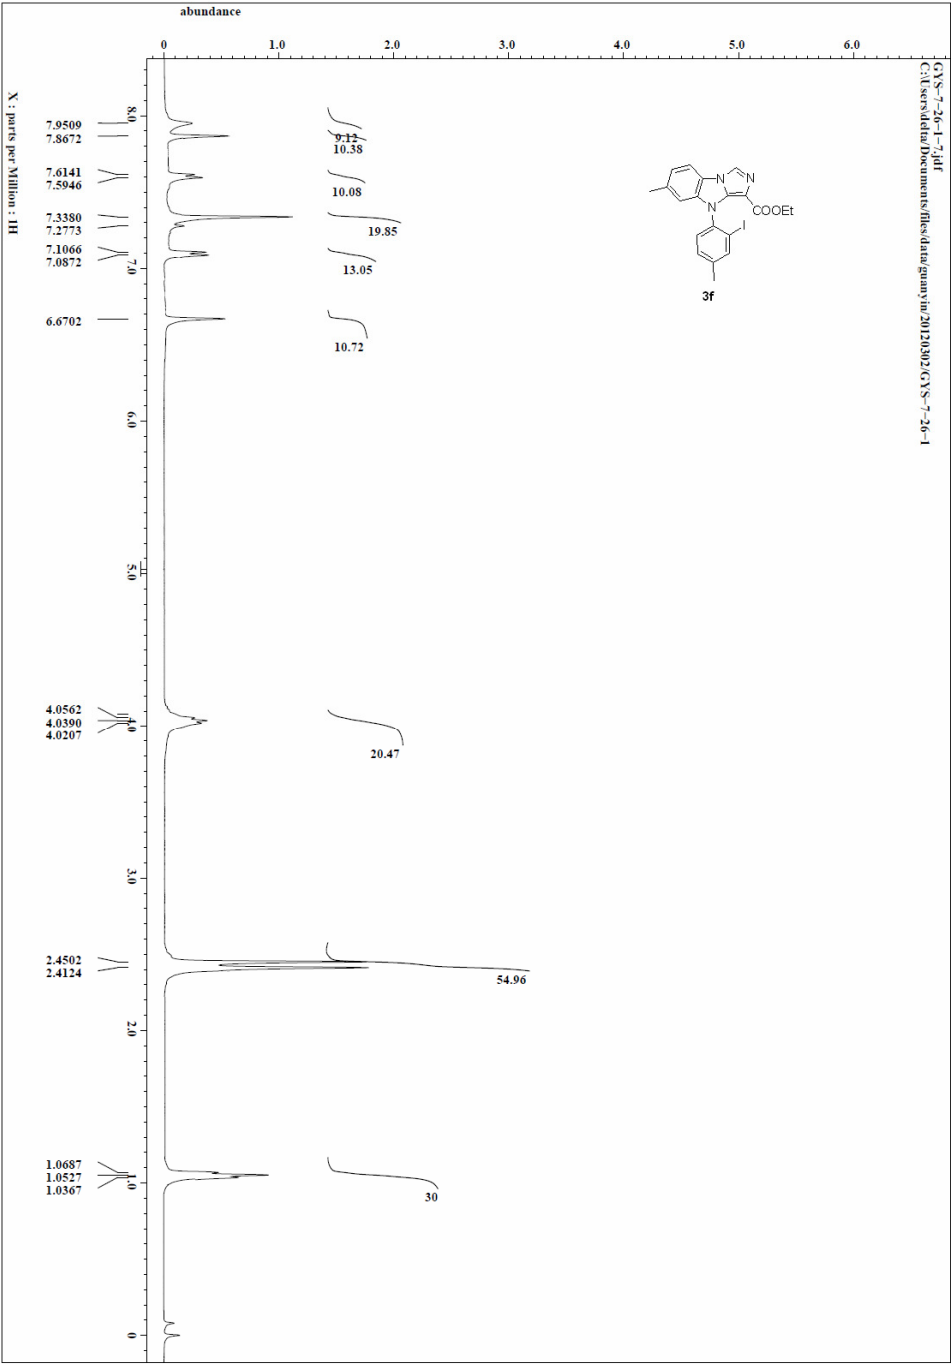

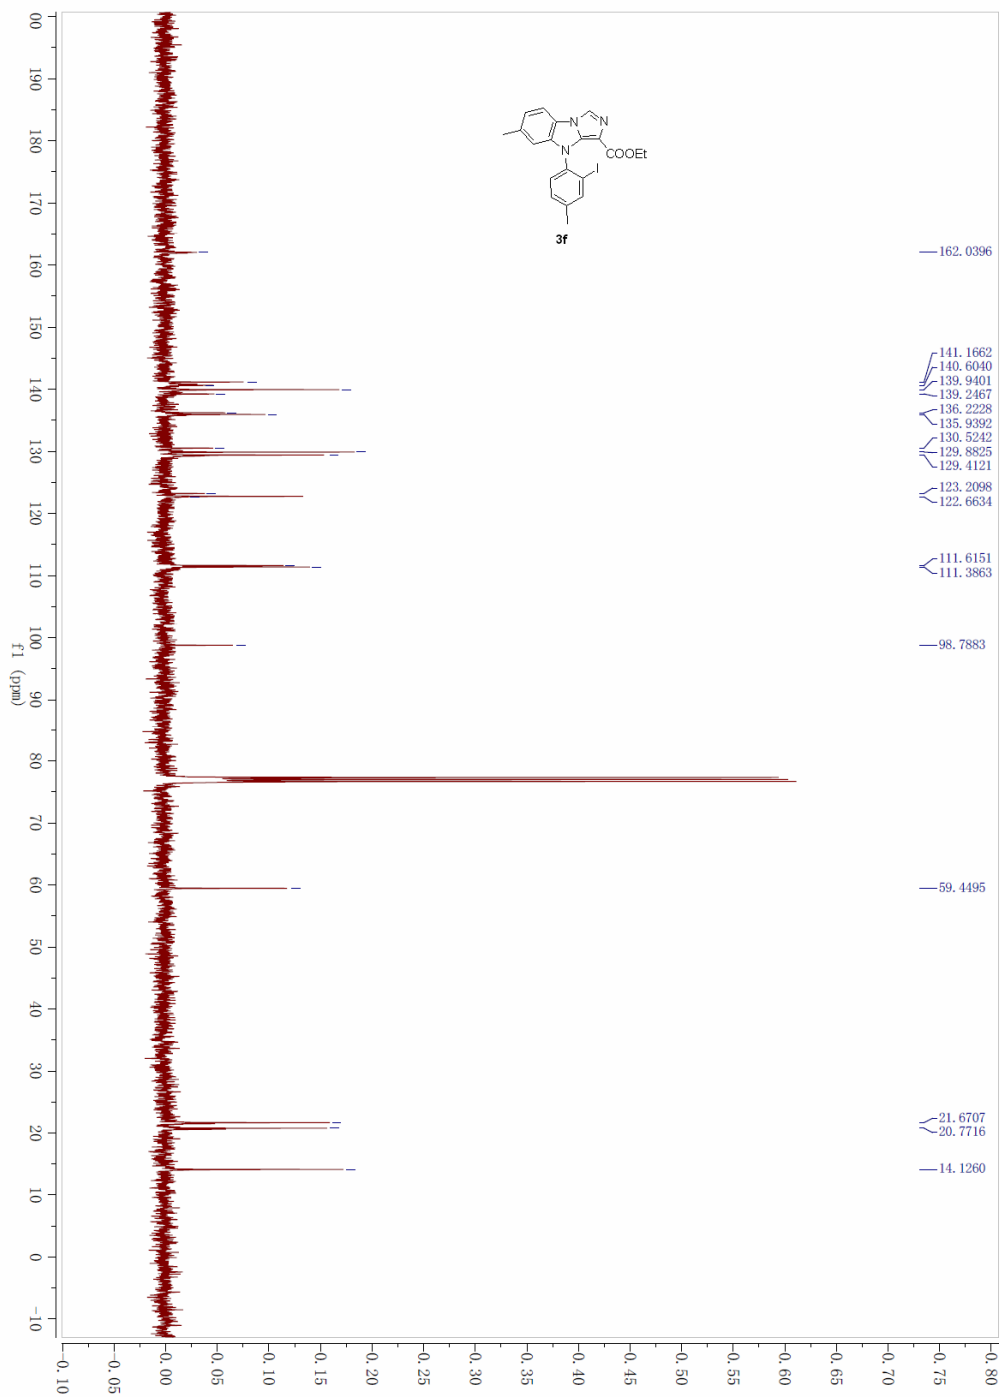

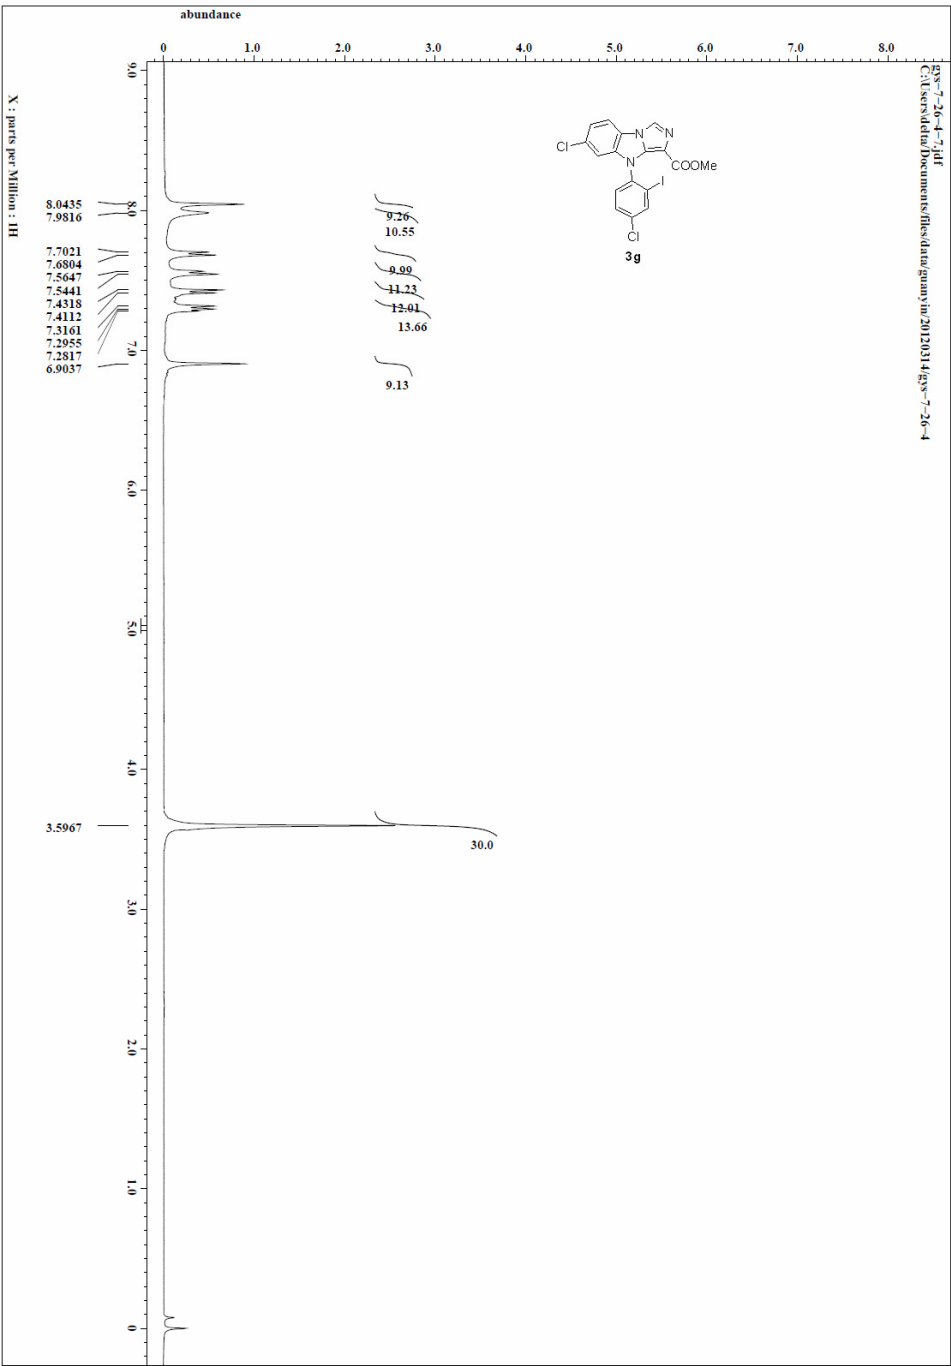

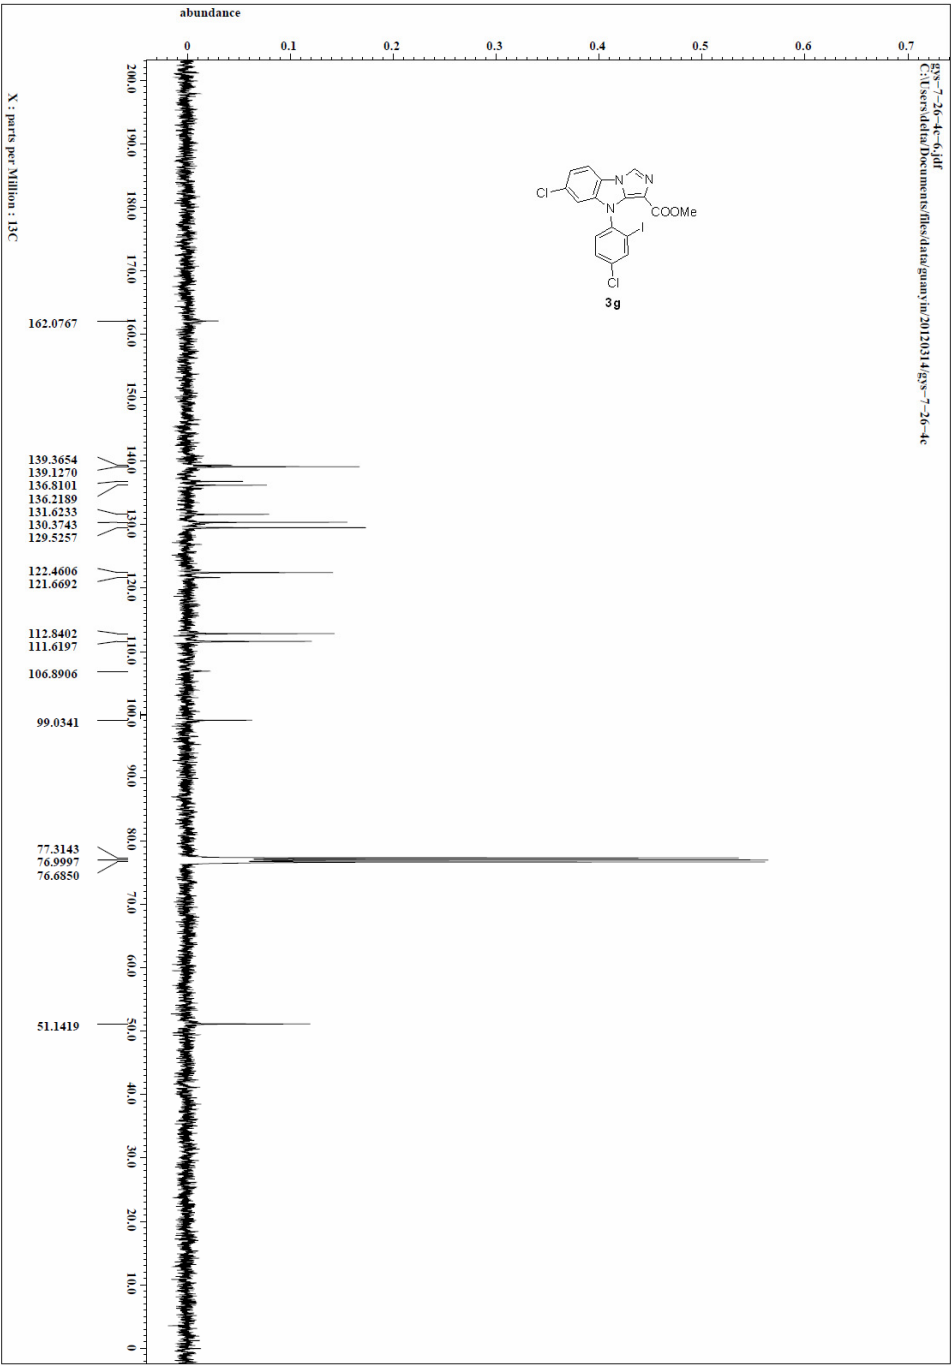

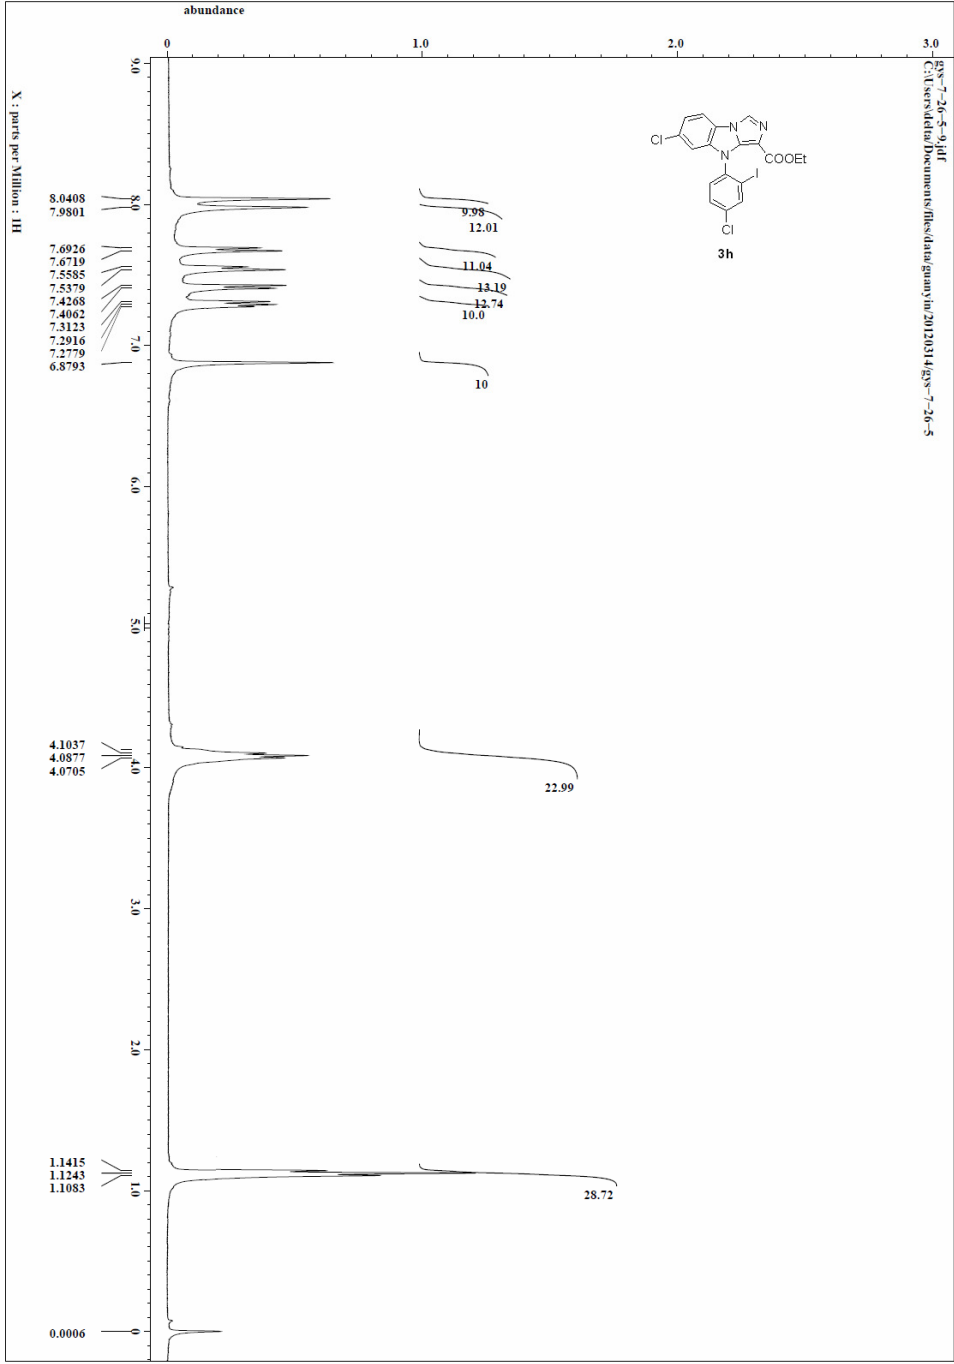

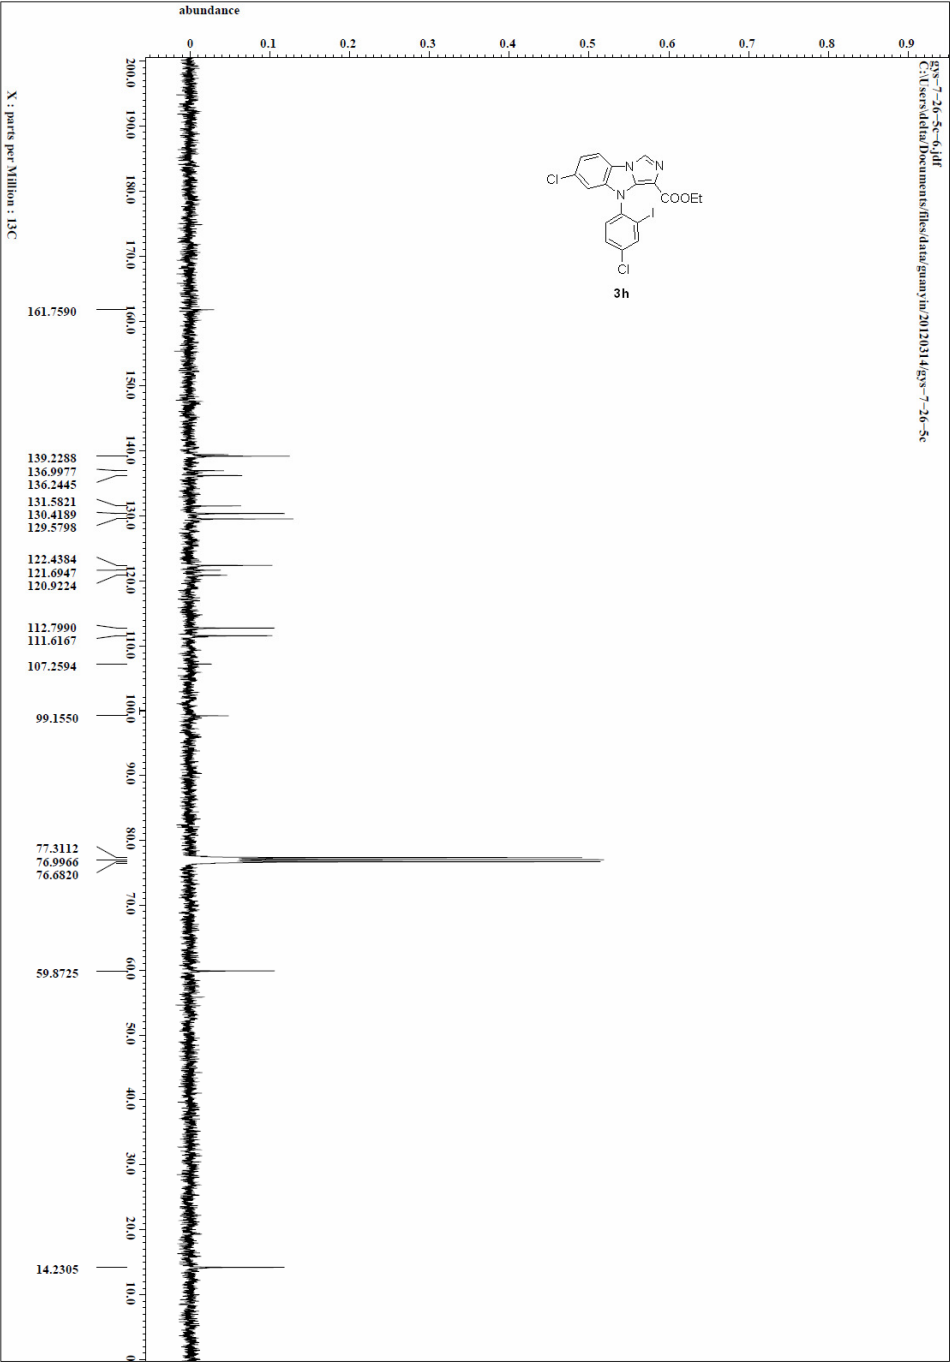



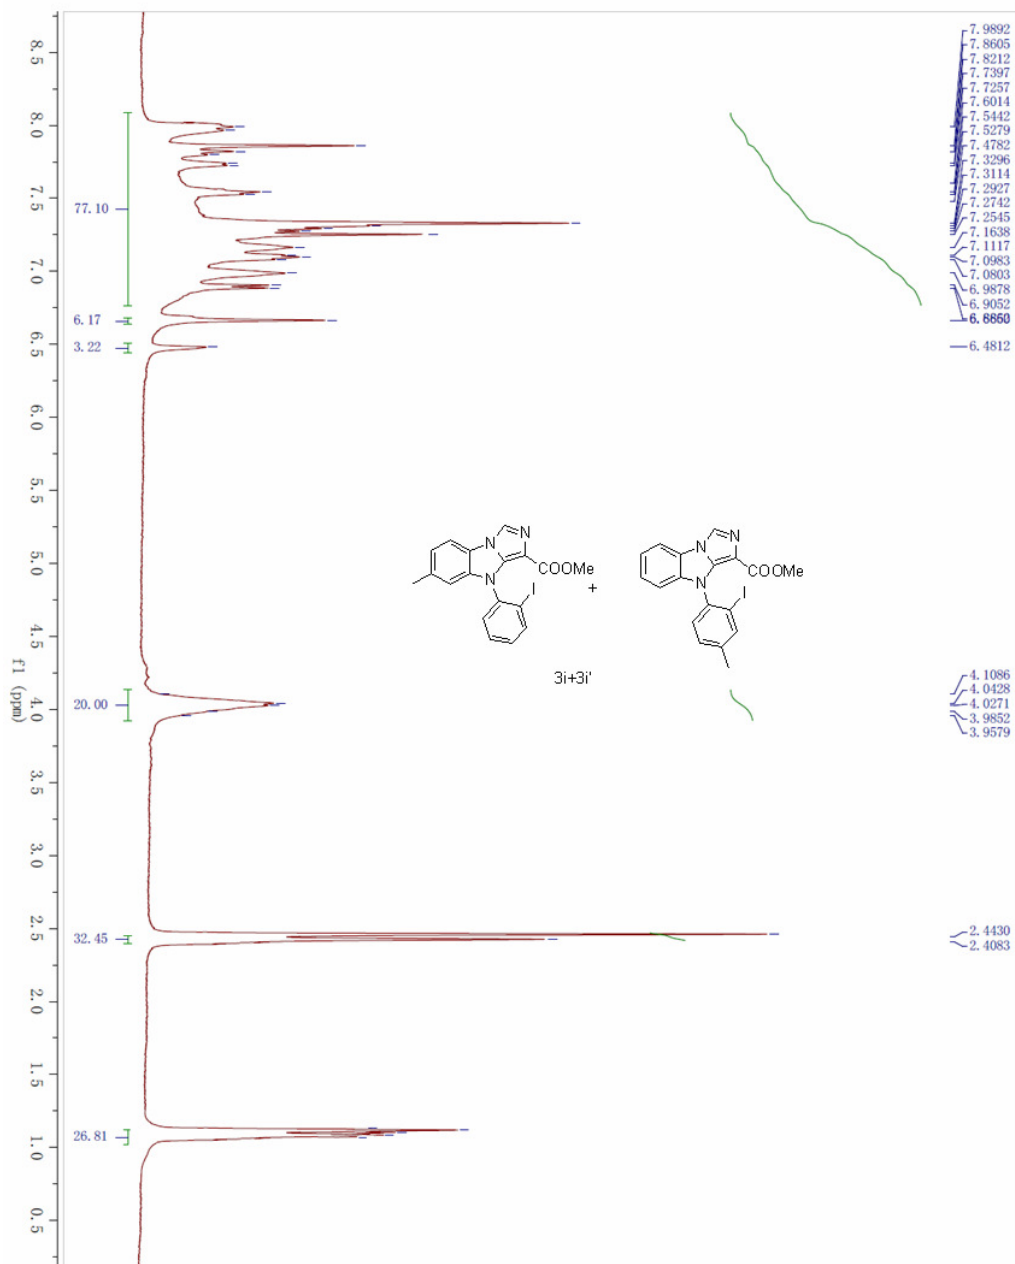

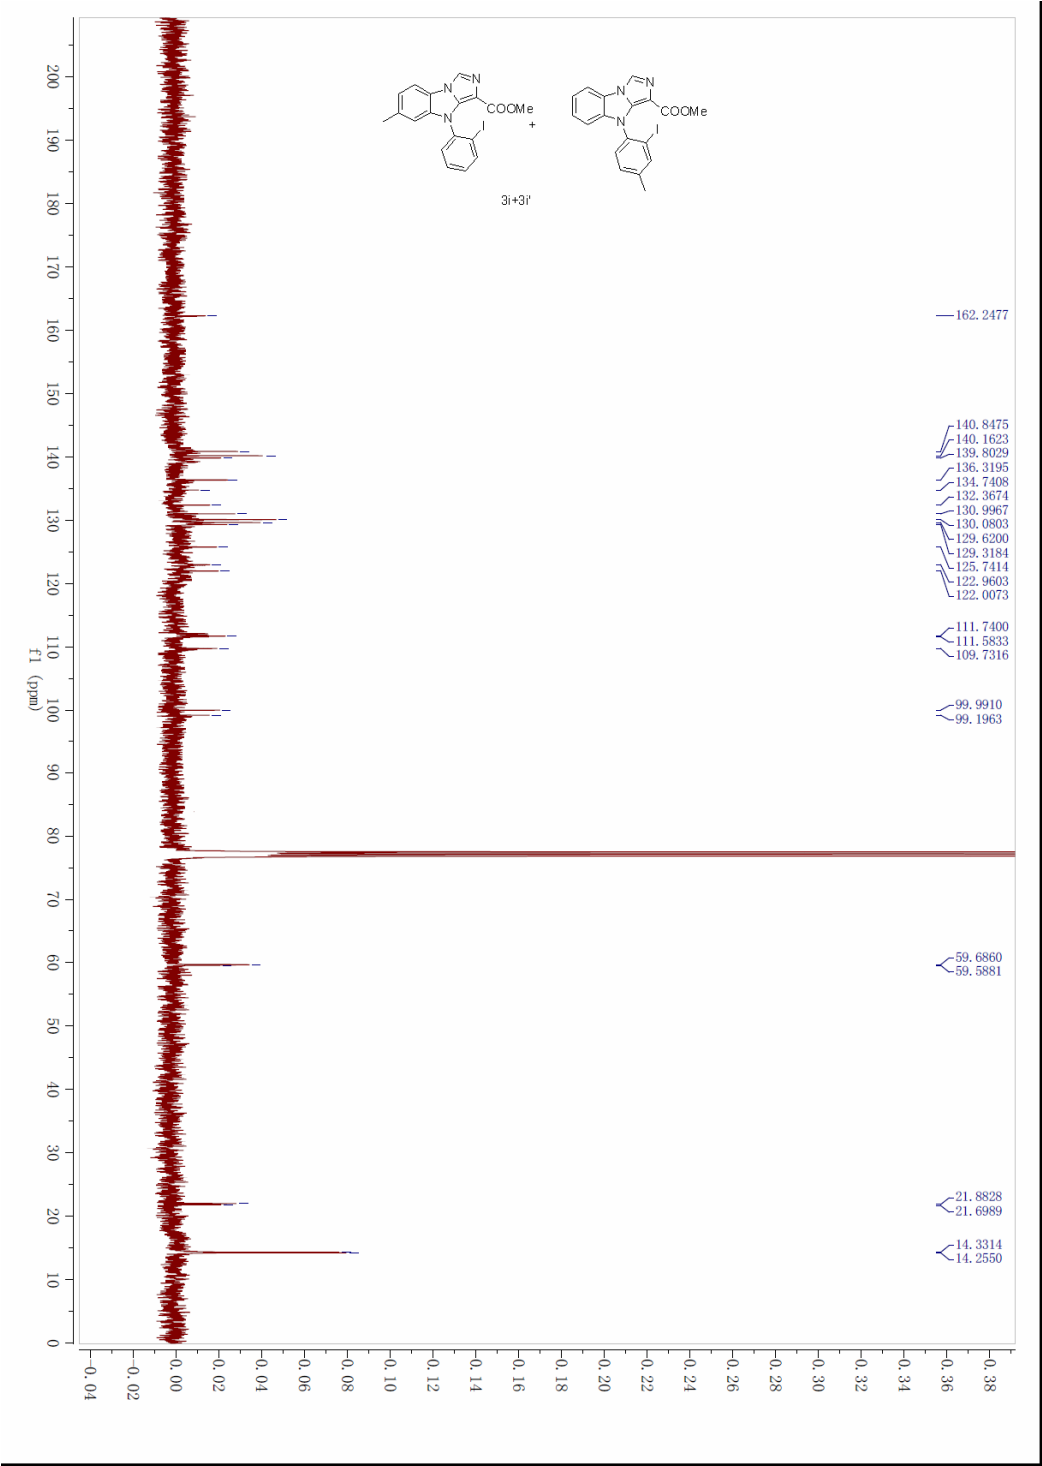

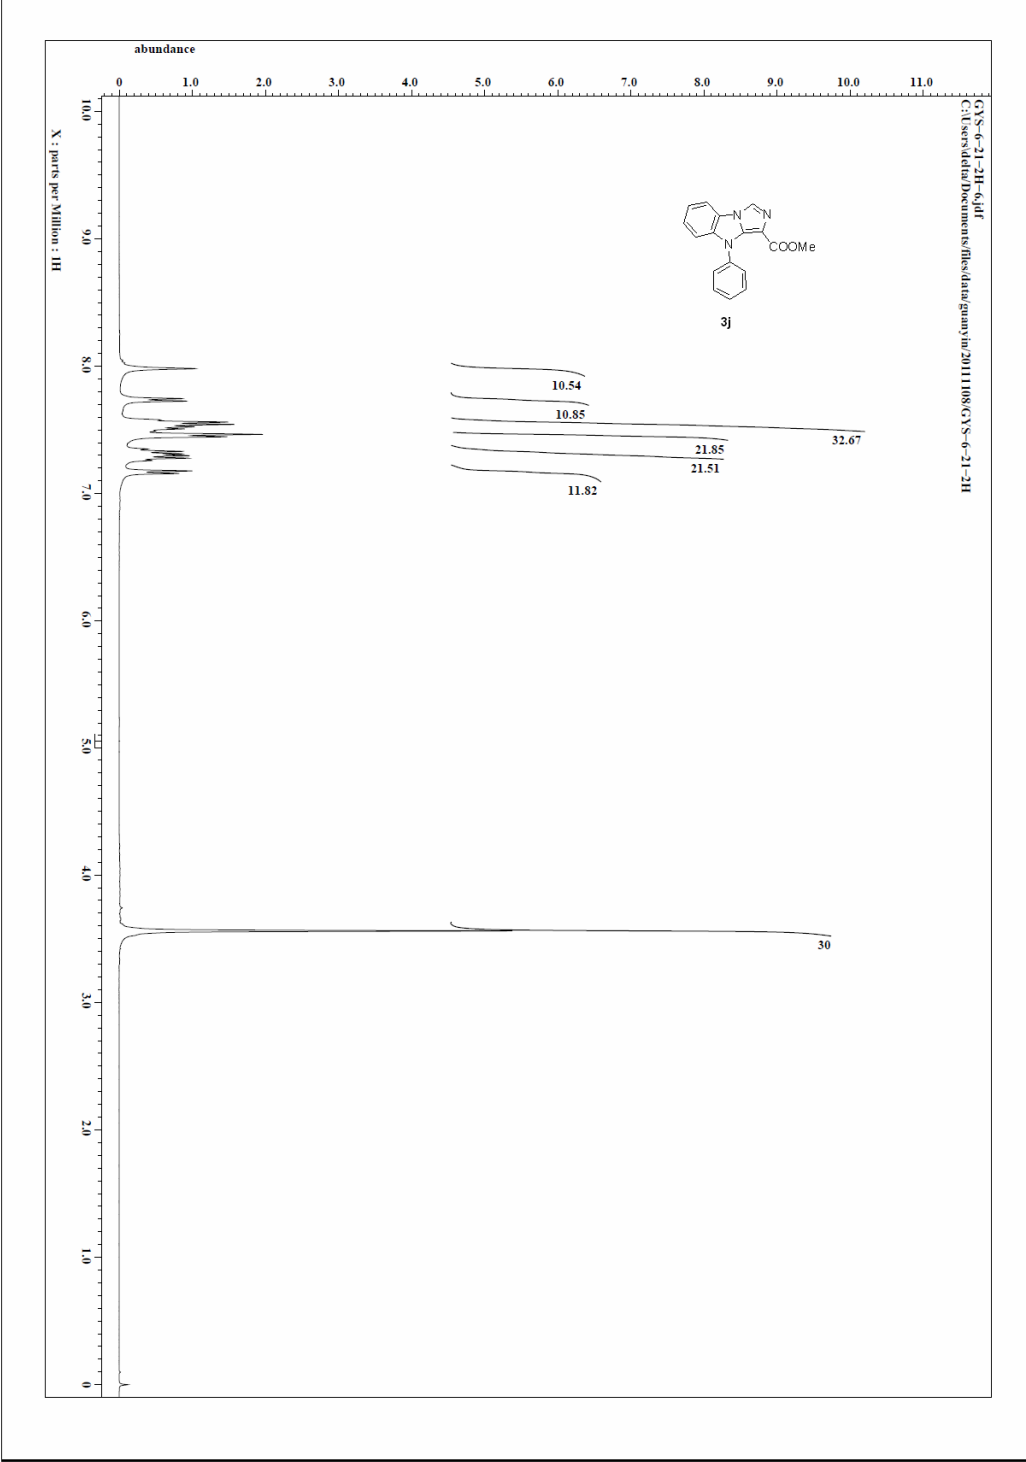

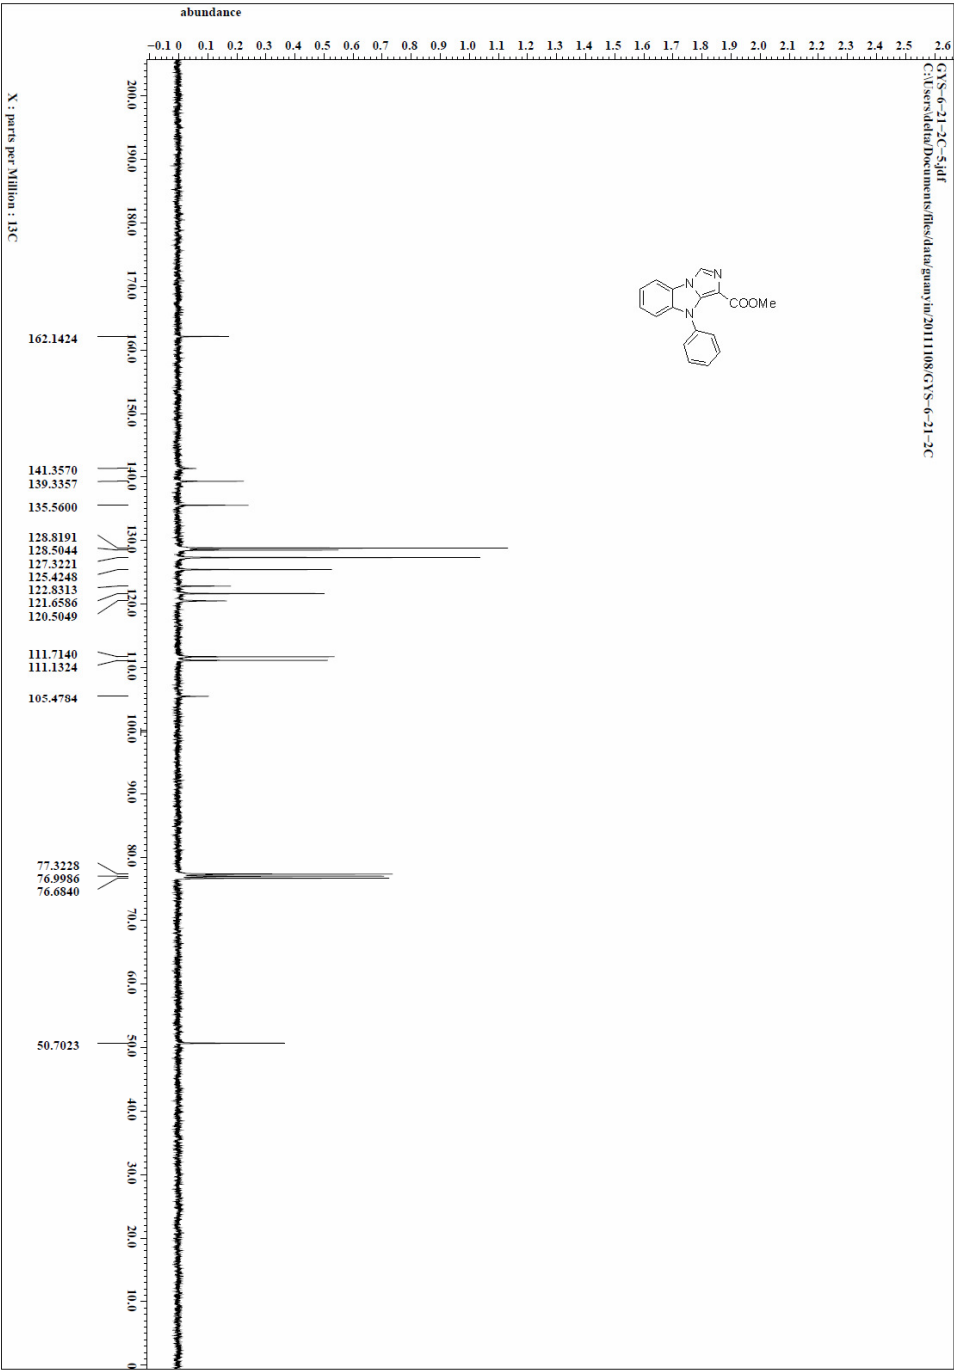

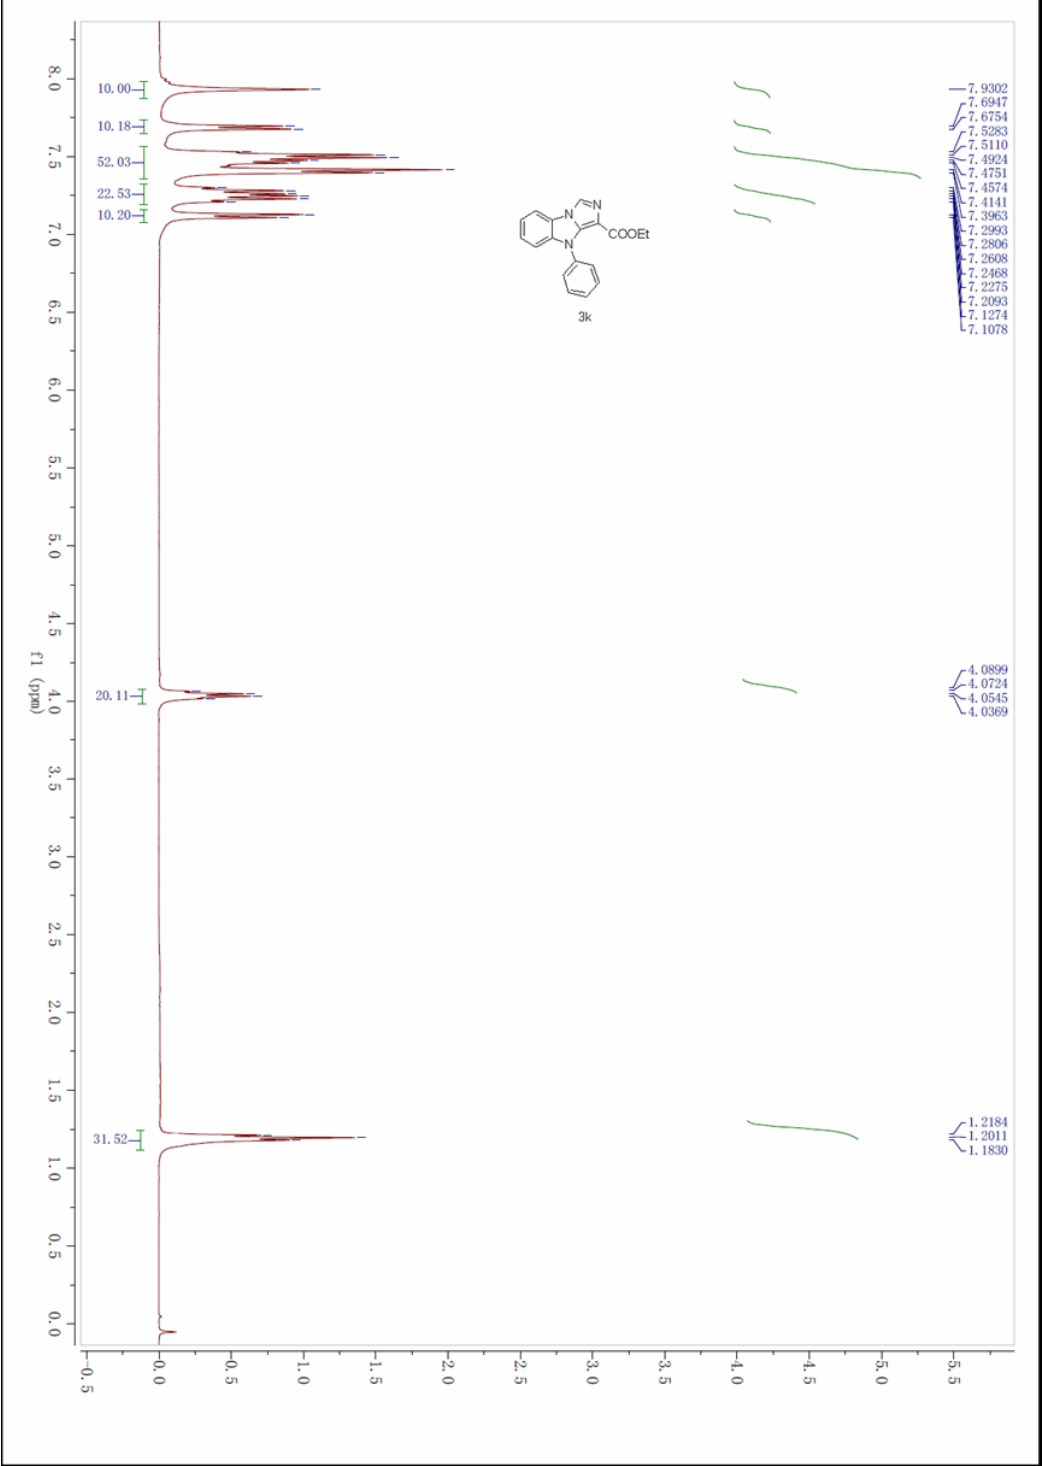

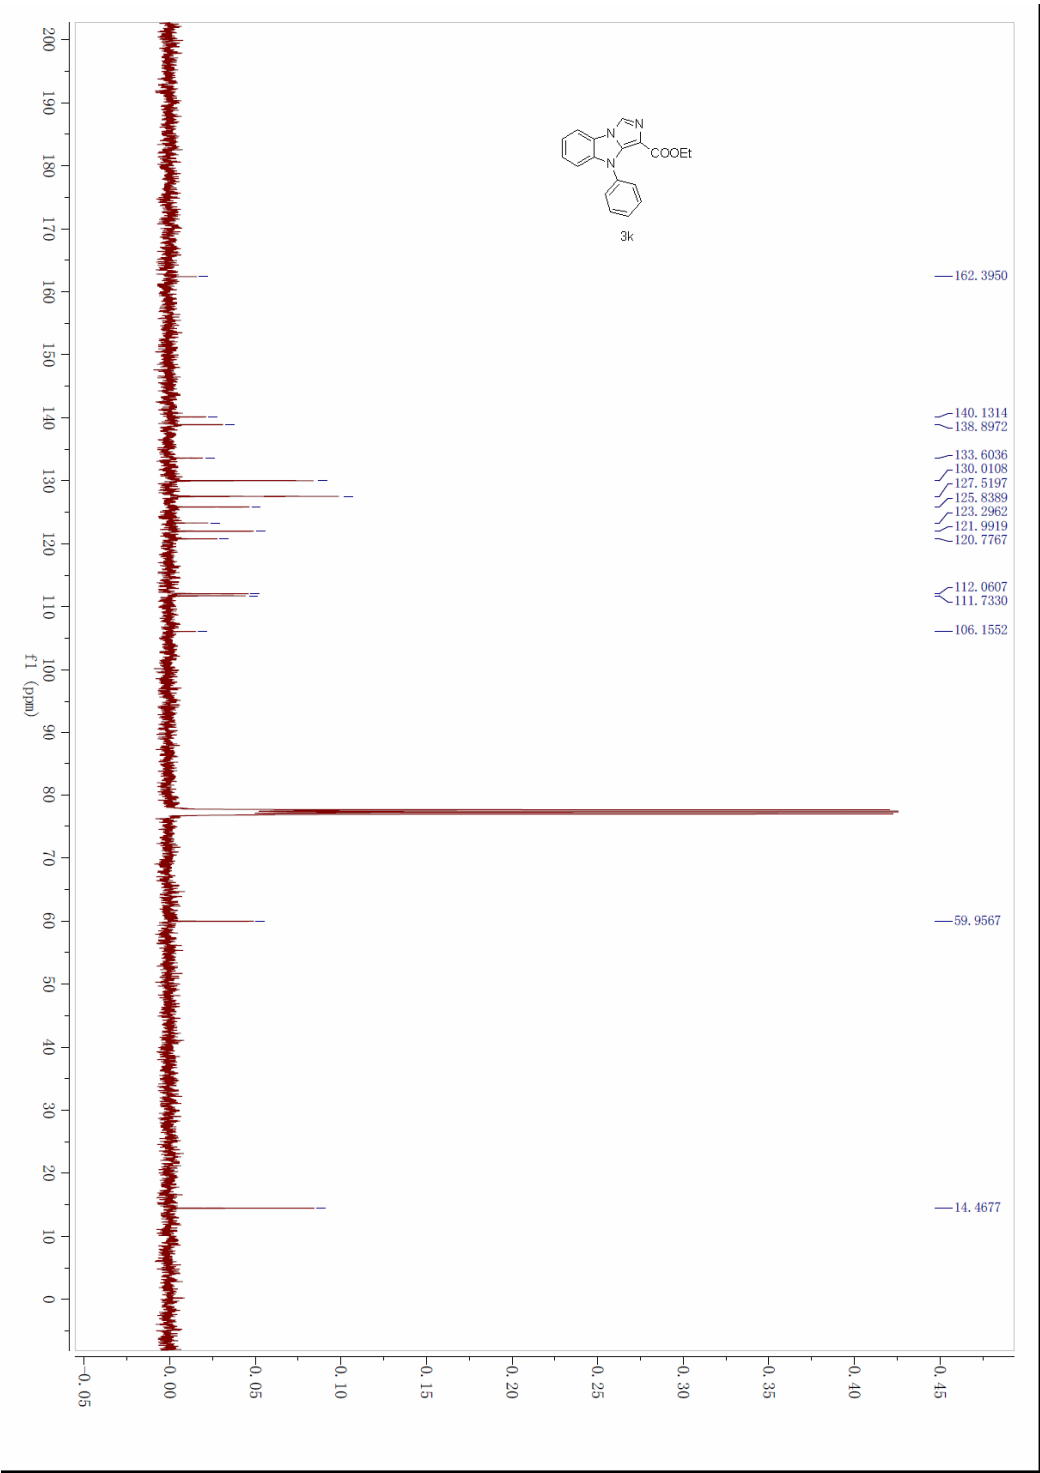

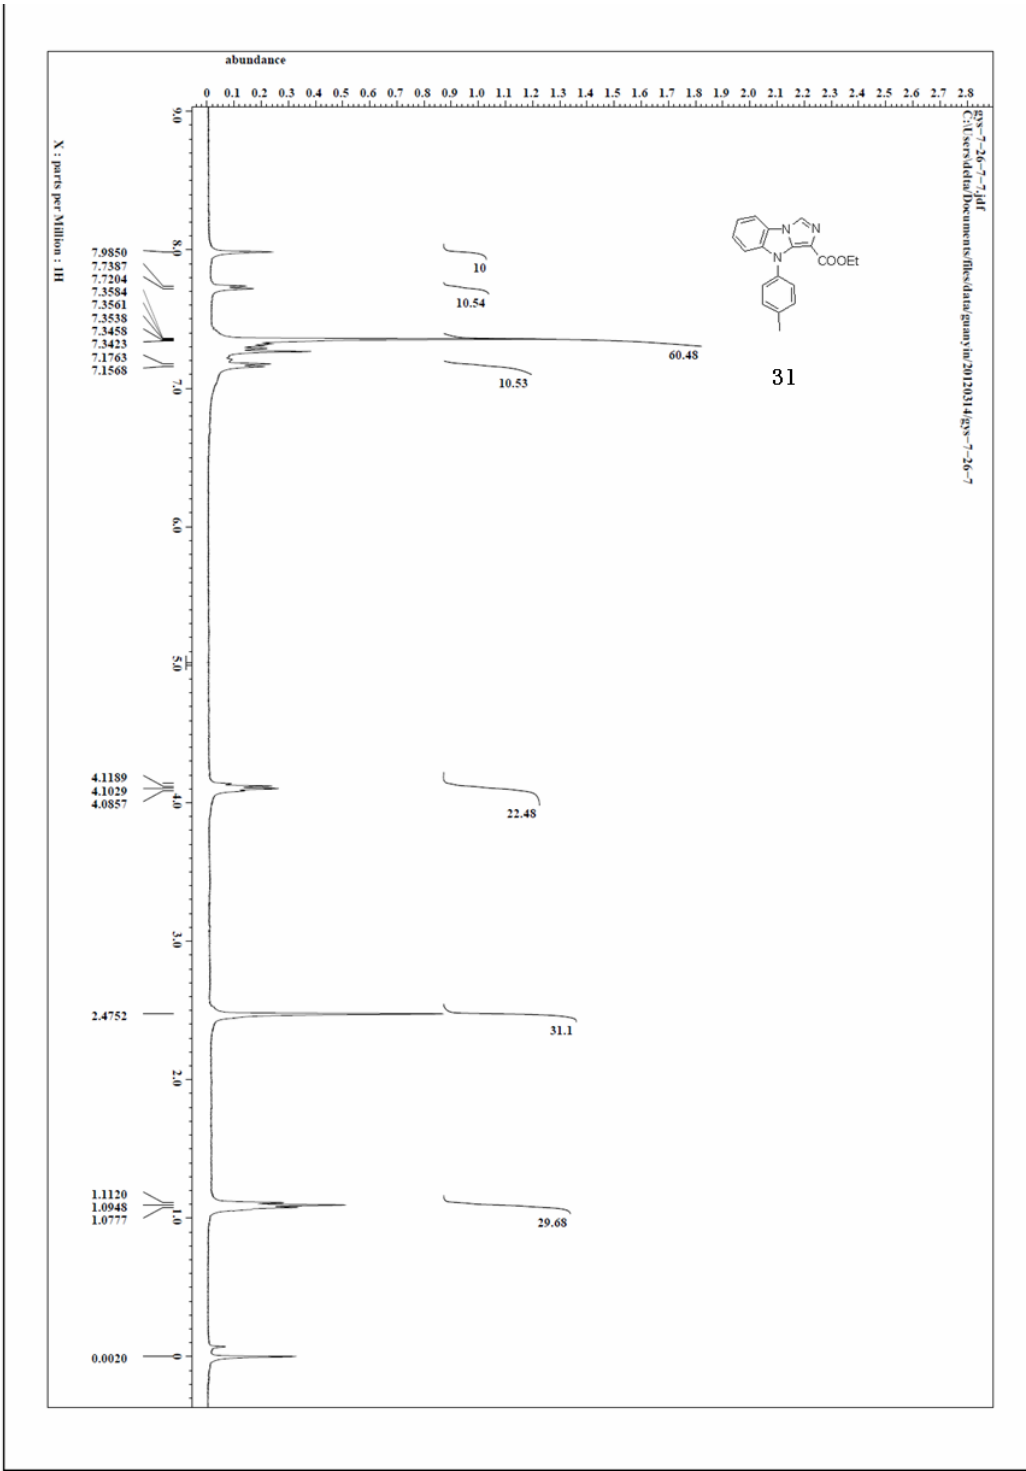

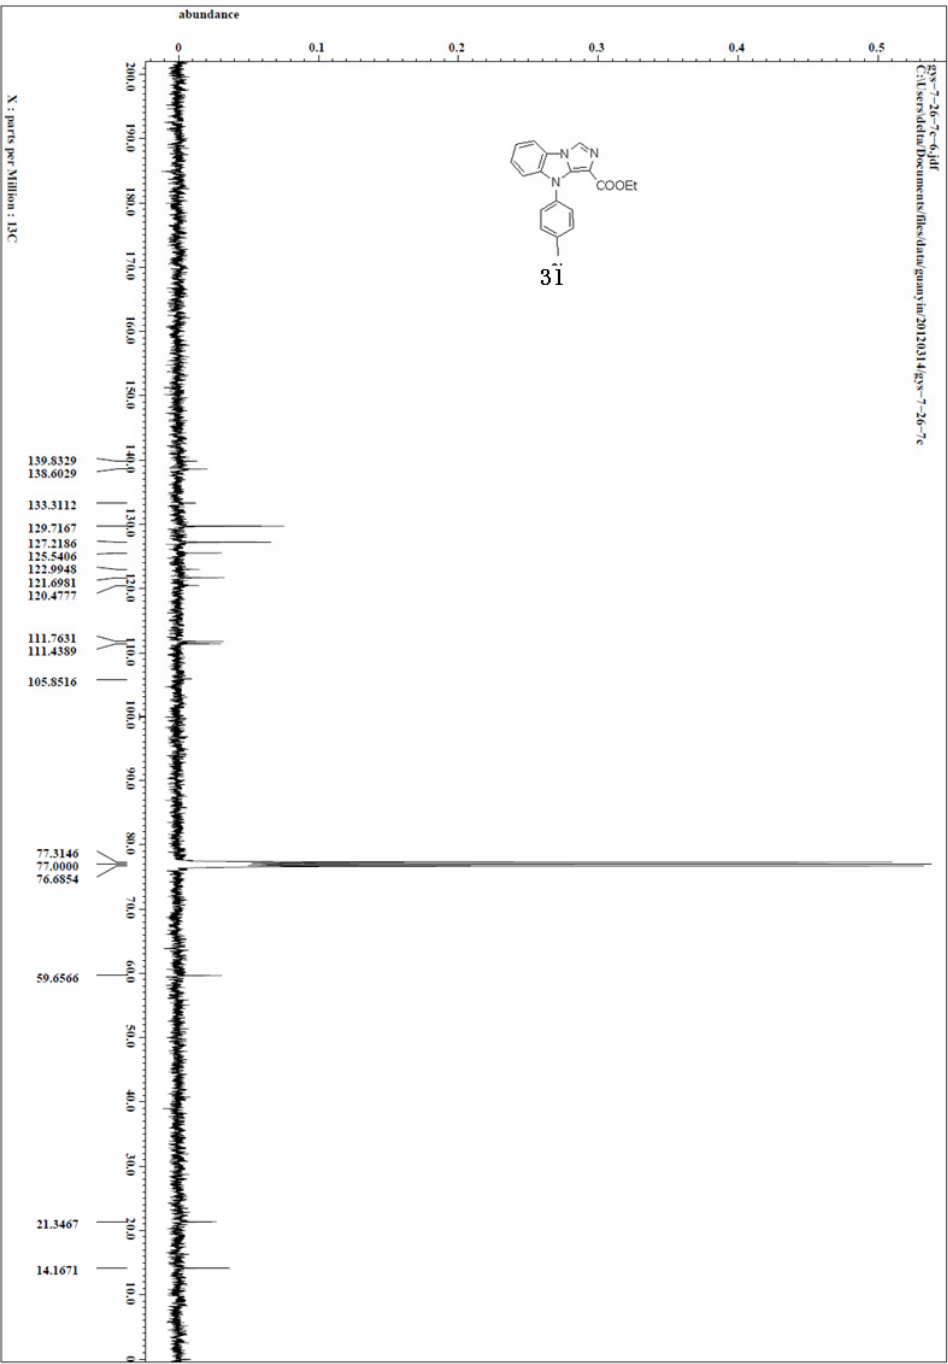



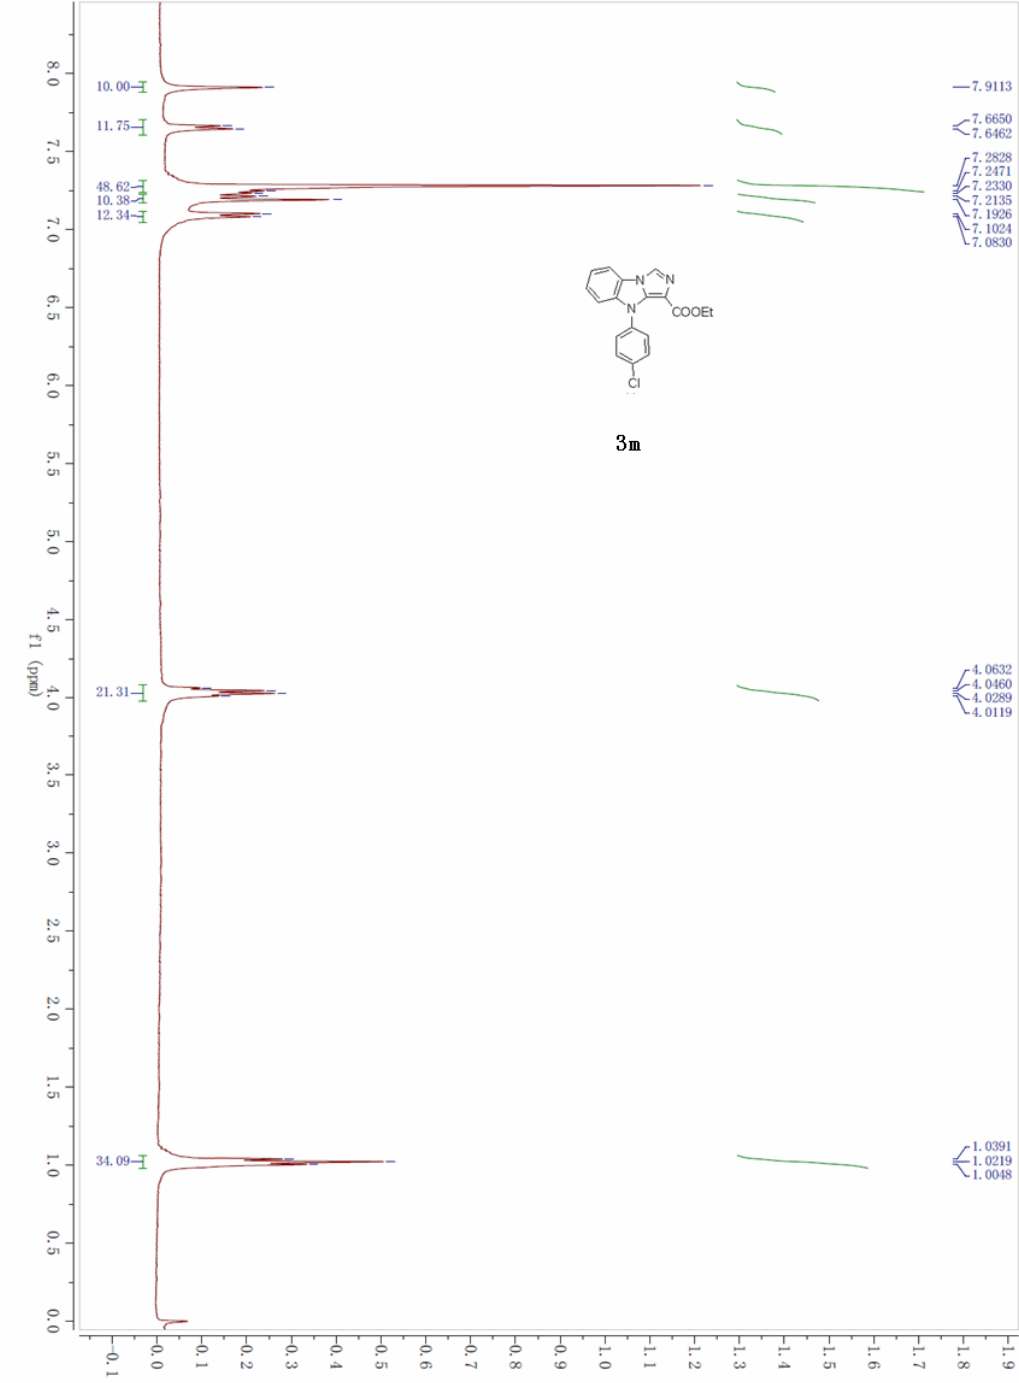

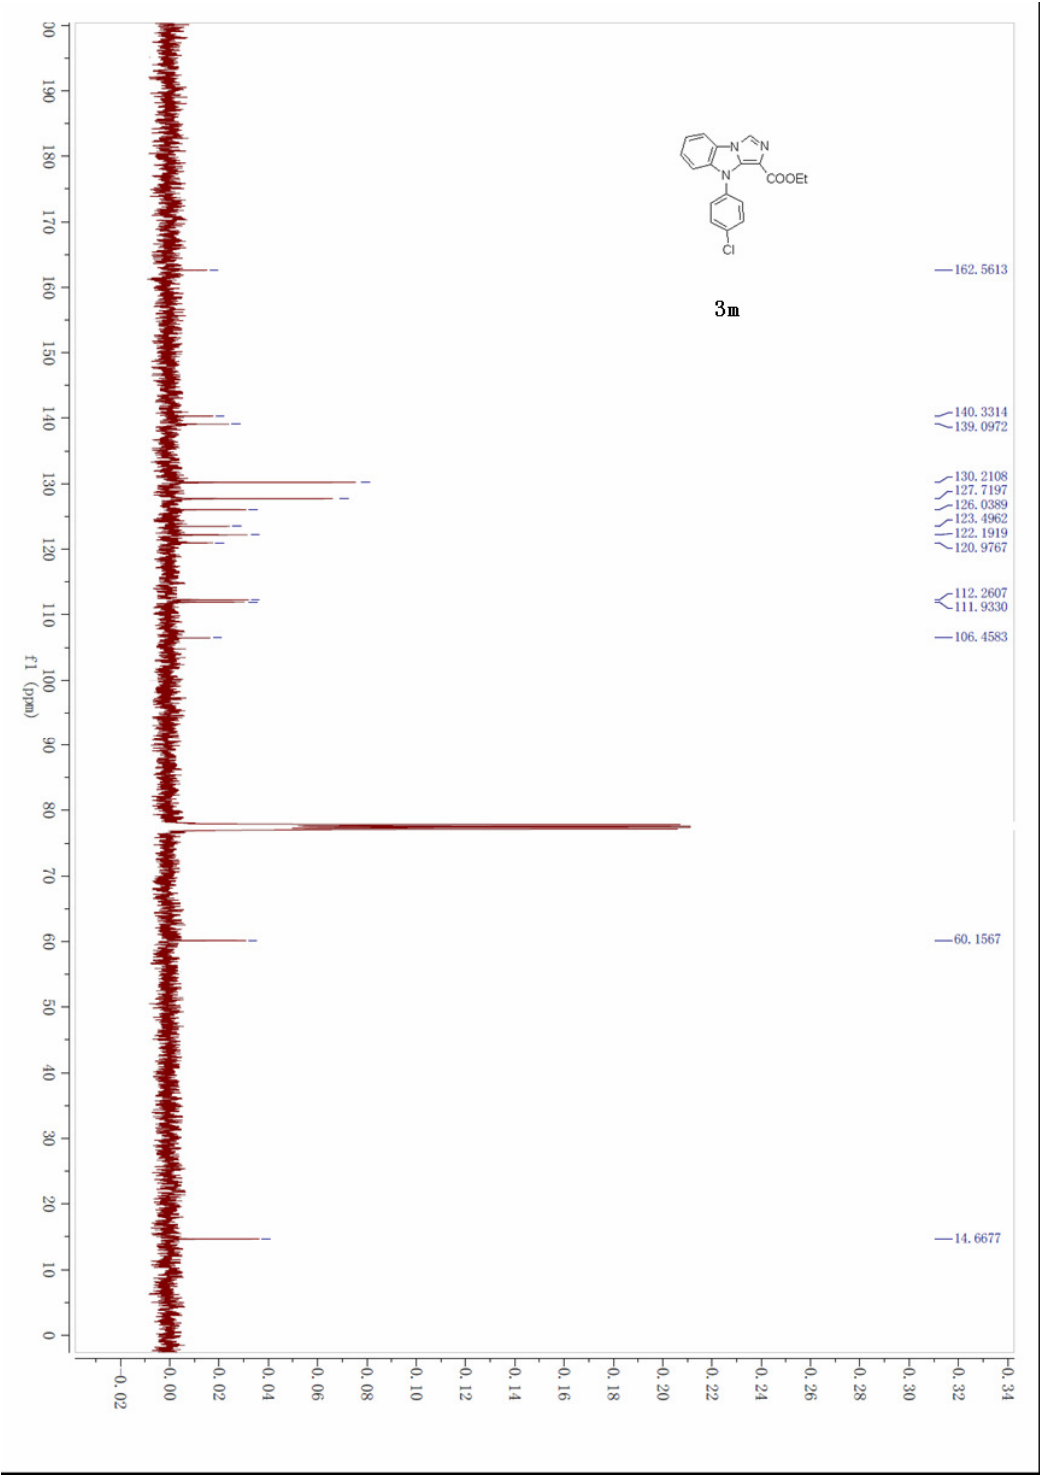

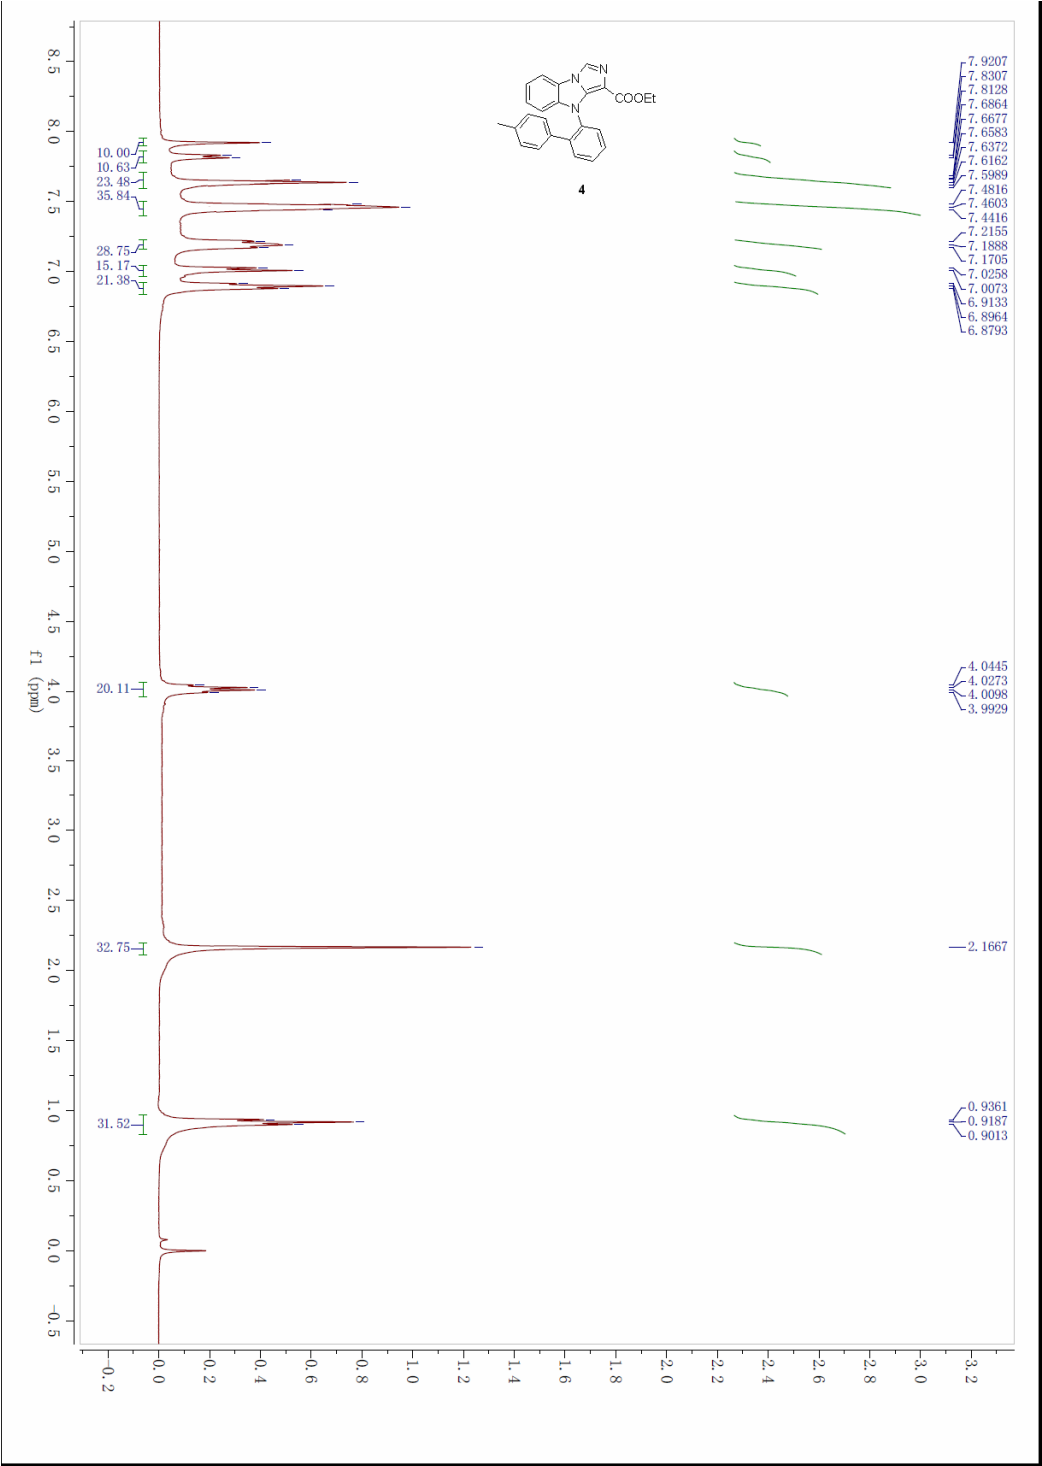

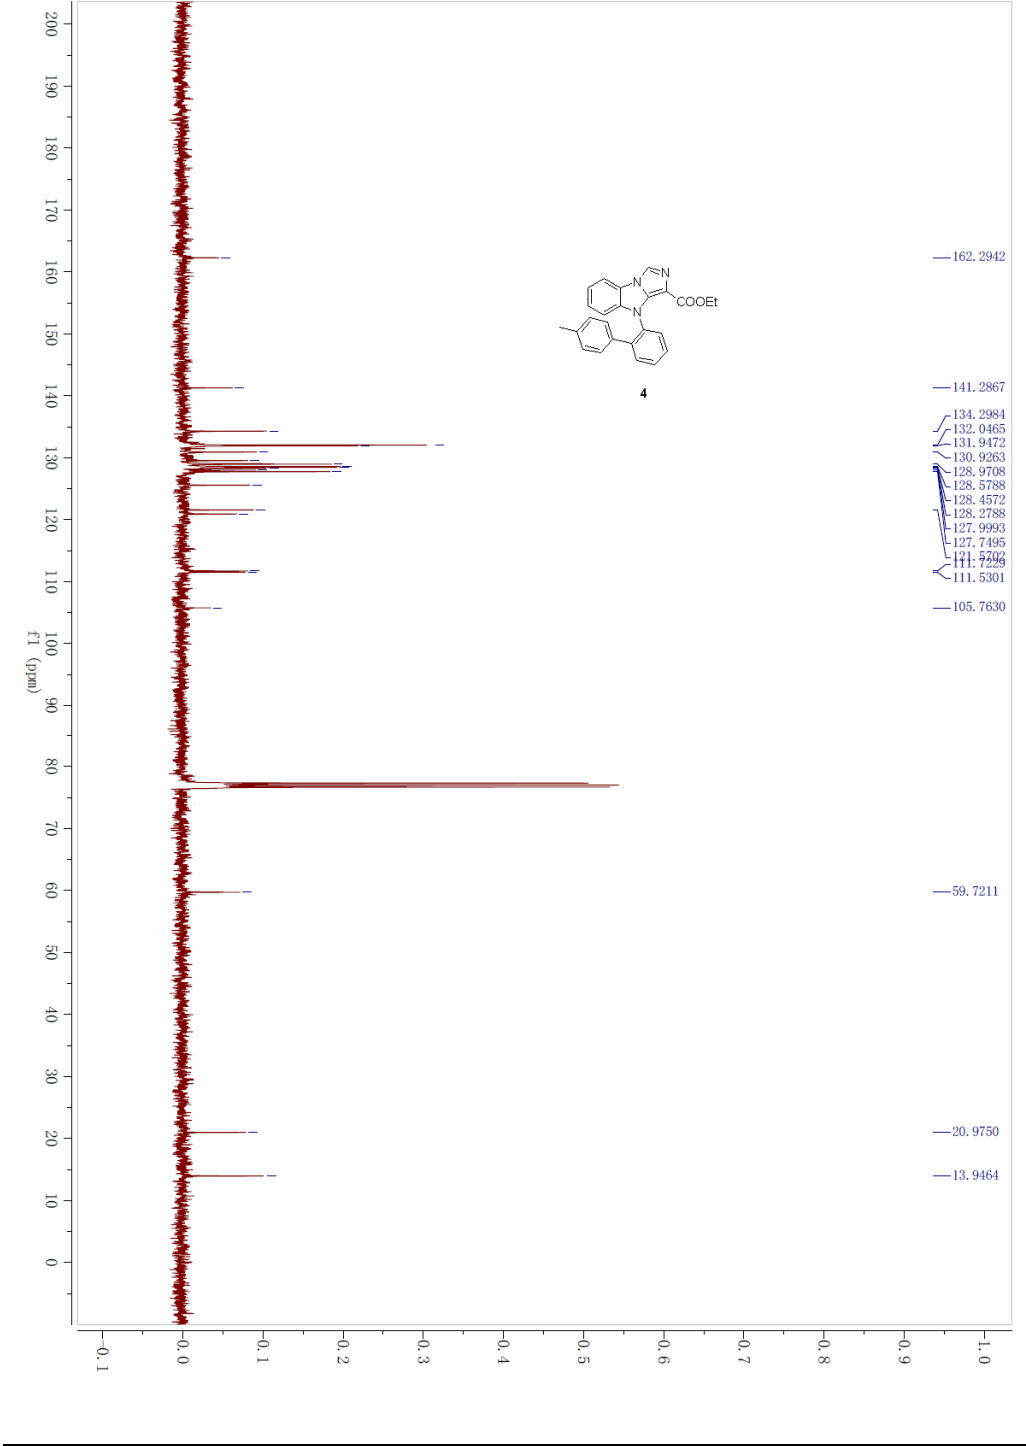

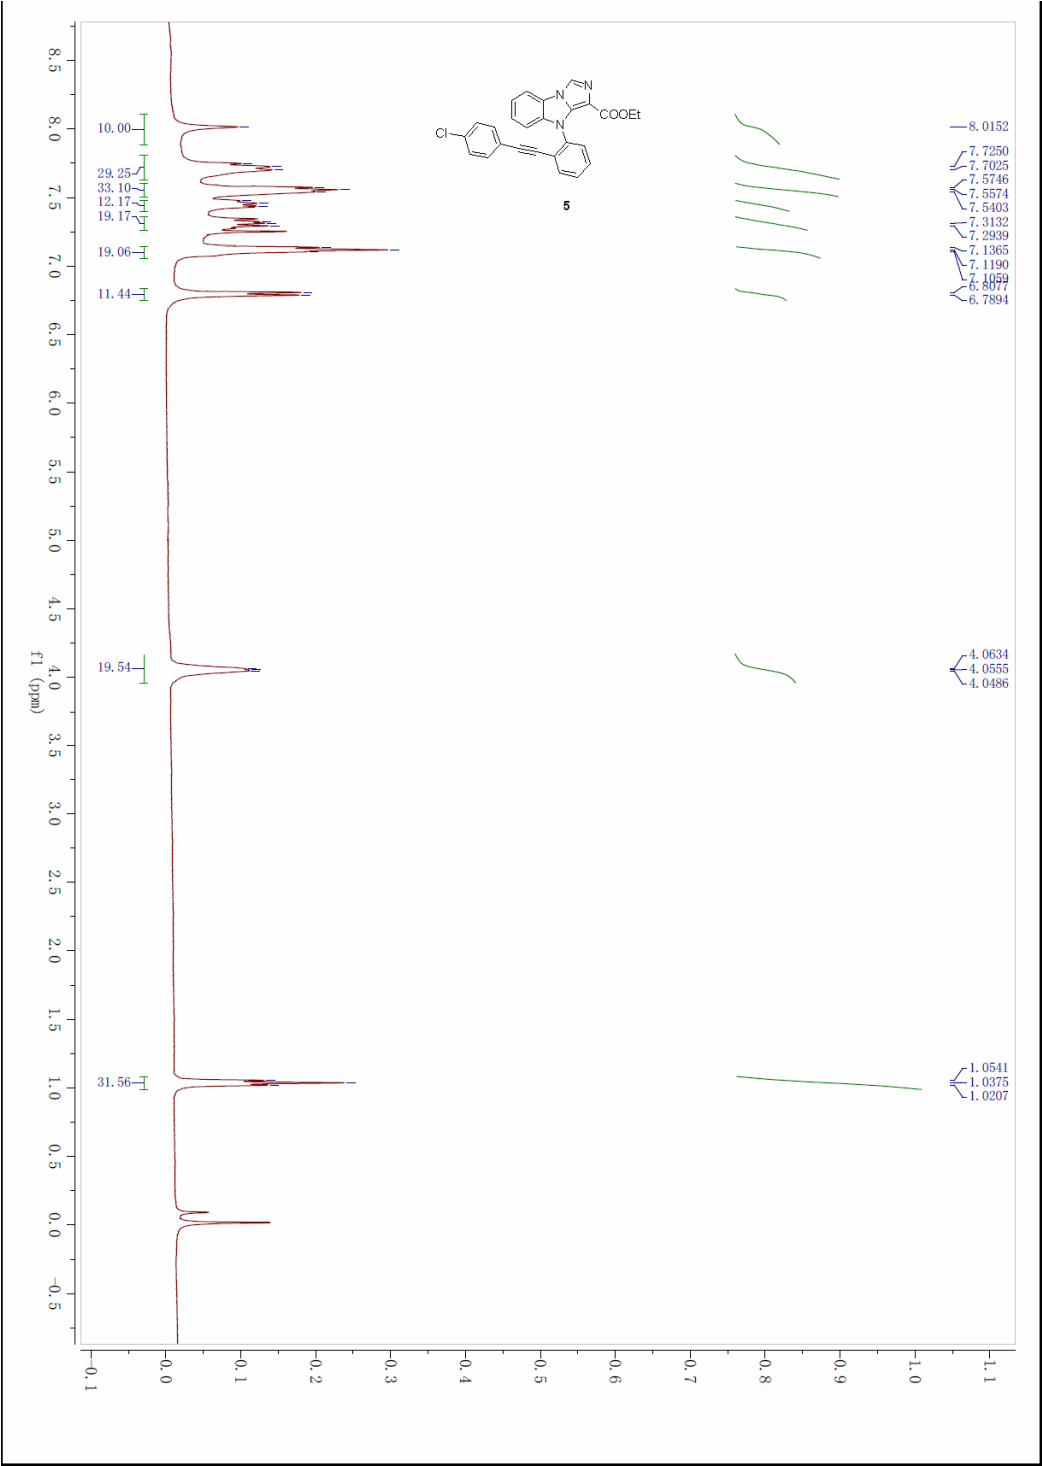

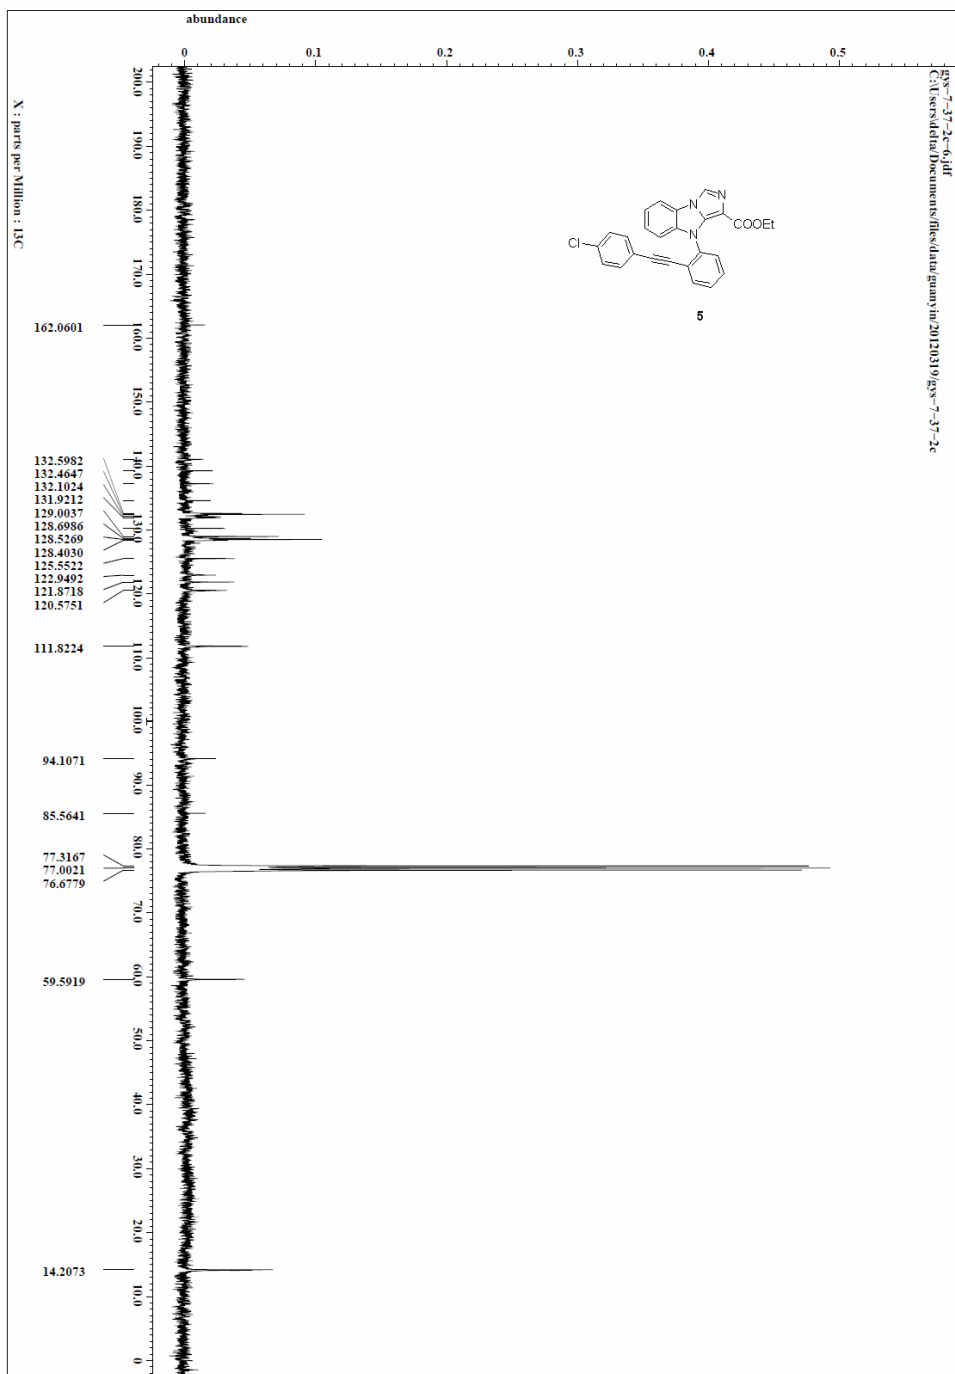

Supplement: c2cc32135a.pdf [file c2cc32135a.pdf]
